# Supplementary material for: Reliability of wireless monitoring using a wearable patch sensor in high-risk surgical patients at a step-down unit in the Netherlands: a clinical validation study
Source: PubMed Central journal article supplement — BMJ Open. 2018 Feb 27;8(2):e020162. doi: 10.1136/bmjopen-2017-020162 (PMC5855309; doi:10.1136/bmjopen-2017-020162), 2018-02-27
Supplement: bmjopen-2017-020162.draft_revisions.pdf [file bmjopen-2017-020162.draft_revisions.pdf]

# BMJ Open

BMJ Open is committed to open peer review. As part of this commitment we make the peer review history of every article we publish publicly available.

When an article is published we post the peer reviewers' comments and the authors' responses online. We also post the versions of the paper that were used during peer review. These are the versions that the peer review comments apply to.

The versions of the paper that follow are the versions that were submitted during the peer review process. They are not the versions of record or the final published versions. They should not be cited or distributed as the published version of this manuscript.

BMJ Open is an open access journal and the full, final, typeset and author-corrected version of record of the manuscript is available on our site with no access controls, subscription charges or pay-per-view fees (<http://bmjopen.bmj.com>).

If you have any questions on BMJ Open's open peer review process please email [info.bmjopen@bmj.com](mailto:info.bmjopen@bmj.com)

# BMJ Open

## Wireless monitoring of high-risk patients using a wearable patch sensor: a clinical validation study

|                                 |                                                                                                                                                                                                                                                                                                                                                                                                                              |
|---------------------------------|------------------------------------------------------------------------------------------------------------------------------------------------------------------------------------------------------------------------------------------------------------------------------------------------------------------------------------------------------------------------------------------------------------------------------|
| Journal:                        | <i>BMJ Open</i>                                                                                                                                                                                                                                                                                                                                                                                                              |
| Manuscript ID                   | bmjopen-2017-020162                                                                                                                                                                                                                                                                                                                                                                                                          |
| Article Type:                   | Research                                                                                                                                                                                                                                                                                                                                                                                                                     |
| Date Submitted by the Author:   | 17-Oct-2017                                                                                                                                                                                                                                                                                                                                                                                                                  |
| Complete List of Authors:       | Breteler, Martine; Universitair Medisch Centrum Utrecht, Department of Anesthesiology<br>Huizinga, Erik; Universitair Medisch Centrum Utrecht, Anesthesiology van Loon, Kim; Univ Med Ctr Utrecht, Anesthesiology<br>Leenen, Luke; University Medical Centre Utrecht, Trauma<br>Dohmen, Daan; FocusCura<br>Kalkman, Cor; UMC Utrecht, Anesthesiology<br>Blokhuis, Taco; Universitair Medisch Centrum Utrecht, Trauma Surgery |
| <b>Primary Subject Heading</b>: | Surgery                                                                                                                                                                                                                                                                                                                                                                                                                      |
| Secondary Subject Heading:      | Nursing                                                                                                                                                                                                                                                                                                                                                                                                                      |
| Keywords:                       | Telemedicine < BIOTECHNOLOGY & BIOINFORMATICS, Vital signs, Wireless technology, Remote monitoring, Continuous monitoring                                                                                                                                                                                                                                                                                                    |
|                                 |                                                                                                                                                                                                                                                                                                                                                                                                                              |

SCHOLARONE™  
Manuscripts

Only

## Wireless monitoring of high-risk patients using a wearable patch sensor: a clinical validation study

M.J.M. Breteler<sup>1,3</sup>, E. Huizinga<sup>1</sup>, K. van Loon<sup>1</sup>, L.P.H. Leenen<sup>2</sup>, D.A.J. Dohmen<sup>3</sup>, C.J. Kalkman<sup>1</sup>, T. J. Blokhuis<sup>2,4</sup>

<sup>1</sup>Department of Anesthesiology, University Medical Center Utrecht, Utrecht University, The Netherlands

<sup>2</sup>Department of Trauma Surgery, University Medical Center Utrecht, Utrecht, The Netherlands

<sup>3</sup>FocusCura, Driebergen-Rijsenburg, The Netherlands

<sup>4</sup>Department of Surgery, Maastricht University Medical Center, Maastricht, The Netherlands

*Corresponding author:*

Martine Breteler

University Medical Center Utrecht, Mailstop Q.04.2.313

P.O. Box 85500, 3508 GA Utrecht, The Netherlands

Email: [m.j.m.breteler@umcutrecht.nl](mailto:m.j.m.breteler@umcutrecht.nl)

Phone: +31 6 47306841

Word count: 3733

## ABSTRACT

**Background and objectives:** Intermittent vital signs measurements are the current standard on hospital wards, typically recorded once every 8h. Early signs of deterioration may therefore be missed. Recent innovations have resulted in ‘wearable’ sensors, which may capture patient deterioration at an earlier stage. The objective of this study was to determine whether a wireless ‘patch’ sensor is able to reliably measure respiratory and heart rate continuously in high-risk surgical patients. The secondary objective was to explore the potential of the wireless sensor to serve as a safety monitor.

**Design:** In an observational methods comparisons study, patients were measured with both the wireless sensor and bedside routine standard for at least 24 hours.

**Setting:** University teaching hospital, single center.

**Participants:** Twenty-five postoperative surgical patients admitted to a step-down unit.

**Outcome measures:** Primary outcome were limits of agreement and bias of heart rate and respiratory rate. Secondary outcome measures were sensor reliability, defined as time until first occurrence of data loss.

**Results:** 1568 hours of vital signs data were analyzed. Bias and 95% limits of agreement for heart rate were -1.1 (-8.8 to 6.5) beats per minute. For respiration rate, bias was -2.3 breaths per minute with wide limits of agreement (-15.8 to 11.2 breaths per minute). Median filtering over a 15 minute period improved limits of agreement of both respiration and heart rate. Sixty-three% of the measurements were performed without data loss greater than two minutes. Overall data loss was limited (6% of time).

**Conclusions:** The wireless sensor is capable of accurately measuring heart rate, but accuracy for respiratory rate was outside acceptable limits. Remote monitoring has the potential to contribute to early recognition of physiological decline in high-risk patients. Future studies should focus on the ability to detect patient deterioration on low care environments and at home after discharge.

**Keywords:** telemedicine; vital signs; wireless technology, remote monitoring, continuous monitoring

### STRENGTHS AND LIMITATIONS OF THIS STUDY

- This is the first study that investigated the reliability of measuring vital signs continuously for more than 1568 hours with a wearable patch sensor in actual high-risk patients.
- To identify agreement between the two methods for continuous monitoring the Bland and Altman method is not the most appropriate. It measures bias and precision at a certain time point, but cannot inform about the trending ability of the monitoring system. The latter is extremely important since the goal of monitoring is timely recognition of abnormal vital sign patterns.
- The agreement between the two methods improved after (median) filtering the data. Provided one is willing to accept an update rate of once every 15 minutes, such filtering increases the proportion of epochs with reliable measurements and reduces the rate of false positive alarms.
- We used an ‘ICU-grade’ patient monitoring system as reference. However, our results showed that this method cannot be considered a ‘gold’ standard for respiratory rate monitoring.

## INTRODUCTION

While technological advances have resulted in numerous new diagnostic tools and therapeutic innovations, we are still not able to timely recognize patient deterioration on general hospital wards[1,2]. This contributes to avoidable cardiopulmonary arrest, unplanned admission to the intensive care unit (ICU), an increase in hospitalization costs and detrimental effects on quality of life[3-7]. To timely detect patient deterioration, we may benefit from technical solutions that can track patients' vital signs continuously.

Intermittent vital signs measurements, typically once every nurse shift of eight hours, are the current routine monitoring practice on general hospital wards. As a result, patient deterioration in between measurements can be easily missed. In an attempt to improve the detection of patient deterioration, Early Warning Scoring (EWS) protocols and Medical Emergency Teams (METs) have been implemented in most hospitals around the globe. However, failure-to-rescue events continue to occur even with these systems in place[8,9]. This phenomenon is also known as failure of the 'afferent limb' of the EWS system[10-12].

Alongside the attempts to improve detection of patient deterioration on the ward, there is a trend to reduce the duration of hospitalization by discharging patients home early, for example in 'enhanced recovery after surgery' (ERAS) programs[13-15]. Once a patient is back home, EWS protocols and vital signs monitoring are no longer available. Recovery within the patient's own home environment has many advantages, but unavoidably some surgical complications will now become first manifest in the home setting. This increases the risk that patient deterioration will be recognized too late.

The majority of adverse events are preceded by a significant period of change in vital signs[16-20]. Early recognition of the deteriorating patient might be improved if continuous remote monitoring would become available for at-risk patients in 'low care' environments such as the regular hospital ward or in the first few 'critical' days at home after hospital discharge[21,22]. Recent technological innovations have resulted in lightweight 'wearable' wireless sensors capable of recording and transmitting several vital signs such as heart rate (HR), respiration rate (RR), temperature and patient movement. While the majority of the wearable sensors is strictly 'consumer-grade', some manufacturers have obtained CE and/or FDA approval for use in clinical environments. However, validity and accuracy of these so called 'medical-grade' wearables has not been assessed in real clinical environments, with most of the few validation studies performed in healthy volunteers or limited to short periods of measurements in patients with comorbid conditions[23-25].

The objective of this study was to determine whether a wireless adhesive 'patch' sensor is able to reliably measure RR and HR continuously in patients after high-risk surgery. We aimed to verify whether wireless sensor technology is robust and capable of detecting physiological trend patterns in high-risk patients before introducing wireless vital signs monitoring into clinical practice. A secondary objective was to explore the potential of the wireless sensor to serve as a safety monitor in clinical practice.

## Materials & Methods

### Study design and setting

We performed a methods comparisons study with an observational design in which patients were continuously monitored after high-risk surgery during the initial days of recovery at the surgical step-down unit (SDU) of the University Medical Center Utrecht, the Netherlands, a large academic hospital. Formal approval for this study was obtained from the local ethical committee (number 15/550).

### Study participants

Postoperative patients were asked to participate upon admission to the SDU if their expected stay was at least 24 hours. These patients were considered for enrolment because they represent a high-risk subset of surgical patients that is more prone to experience deterioration compared to patients on the general ward. Exclusion criteria were patients with an implantable cardiac device, an allergy to adhesives, wound or skin lesion near the application site, or inability to give informed consent. After written informed consent was obtained, researchers applied the sensor to the patient's chest to start recording vital signs for one to three days using the wearable sensor and the routine monitoring system described hereafter.

#### *Description of the wireless wearable sensor*

The HealthPatch® MD (VitalConnect Inc, San Jose, CA, USA) is a medical-grade lightweight, wireless and wearable adhesive biosensor that measures a number of vital signs continuously: single-lead electrocardiogram (ECG), HR, heart rate variability, RR, skin temperature, body posture and step count. It was designed to facilitate long-term remote monitoring of vital signs and activity metrics within the hospital environment as well as in the post-discharge period at home. The sensor consists of a disposable adhesive patch that houses two ECG electrodes, a thermistor and a zinc-air coin-cell battery. The reusable sensor module contains a triaxial accelerometer and Bluetooth Low Energy (BLE) transceiver (see Appendix 1). The patch can be applied on the patient's chest and measures vital signs continuously up to three days (four days if continuous transmission of its single lead ECG waveform is disabled). The module processes the incoming signals and transmits the data via BLE to a relay device (for this study we used an iPad mini (Apple, Inc. Cupertino, CA, USA) with the 'Healthwatch' (VitalConnect Inc, San Jose, CA, USA) mobile application. This application can display vital signs data in real-time for research purposes, but was not designed to be used as clinical monitoring system. Also, near real-time data can be viewed on the Healthwatch Web cloud based server, to monitor long-term trends. Patient identification information was not entered on the mobile device to ensure privacy protection.

Although the wireless sensor can also measure position and movement (acceleration), in this study we only focused on assessing the accuracy and reliability of RR and HR monitoring. The sensor calculates HR using analysis of the single-lead ECG. The algorithm is based on automated detection of QRS complexes from the ECG waveforms. RR is derived from the combined information from three sources: an embedded algorithm uses a weighted average of two characteristics of the ECG signal: 1.) QRS amplitude modulation and 2.) respiratory sinus arrhythmia (RSA); both ECG-derived signals

1  
2  
3 change during inspiration and expiration[26], and the algorithm uses 3.) accelerometer data produced  
4 by chest movement during respiration [27]. Both HR and RR are updated every 4 s and the  
5 manufacturer states an accuracy of  $\pm 3$  breaths per minute (breaths/min), in the range of 4 to 42  
6 breaths for RR. The stated accuracy of HR is  $\pm 5$  beats per minute (beats/min) or 10% (whichever is  
7 greater), in the range of 30-200 beats/min.  
8

#### 9 *Description of the bedside routine standard*

10  
11 HR and RR of patients were continuously monitored with the wearable sensor and simultaneously  
12 with a multiparameter bedside monitoring system designed for use in ICU's and Operating Rooms  
13 (XPRESSON, Spacelabs Healthcare, Snoqualmie, Washington DC, USA) which served as the  
14 reference monitor. This reference uses ECG for HR detection and measures RR by thoracic impedance  
15 pneumography. It also measures invasive blood pressures as well as arterial oxygen saturation via  
16 pulse oximetry.  
17

#### 18 **Signal analysis**

19  
20 The raw data transmitted by the sensor containing the measurements and their associated time stamps  
21 were retrieved in CSV format. Data were stored and processed using Matlab (The MathWorks Inc.,  
22 Natick, MA, USA). Empty or invalid data ('not-a-number') were removed to obtain continuous 2D  
23 vectors of vital sign samples with their corresponding time stamps. Data reports were automatically  
24 retrieved from the reference monitor. These contained vital signs data sampled once per minute (i.e.,  
25 one measurement was saved and transmitted every minute). The sensor data, originally transmitted  
26 once every four seconds was therefore resampled to once per minute to produce paired data points  
27 with the reference monitor. Furthermore, sensor data and reference data were synchronized to ensure  
28 alignment of their respective time stamps. No artifact removal was applied to the data before analysis.  
29 Besides the analysis on vital signs data transmitted every minute, a median filter over a 15-minute  
30 period was applied to study the effect on HR and RR outliers.  
31  
32

#### 33 **Outcomes**

34  
35 The primary outcome was bias and precision (95% Limits of Agreement; LoA) of HR and RR of the  
36 wireless sensor compared to the bedside monitor. This reference standard reports an accuracy for HR  
37 of  $\pm 1\%$  or 3 beats/min (whichever is greater) and an accuracy of  $\pm 5\%$  or 1 breaths/min (whichever is  
38 greater) for RR[28]. We considered HR and RR to be acceptable for clinical purposes if within  $\pm 10\%$   
39 of the reference monitor or  $\pm 3$  breaths/min or  $\pm 5$  beats/min[29]. A secondary endpoint was the  
40 reliability of detecting true critical clinical conditions such as bradycardia (HR < 50 beats/min),  
41 tachycardia (HR > 100 beats/min), bradypnea (RR < 12 breaths/min) and tachypnea (RR > 20  
42 breaths/min)[30]. Another secondary outcome was the reliability defined as time until the first  
43 occurrence of data loss (defined as a duration of a gap within the data of 2 minutes, 15 minutes, 1 hour  
44 or 4 hours) and the overall amount of data loss from various causes.  
45  
46

#### 47 *Statistical analysis*

48  
49 The series of observation pairs of HR and RR measurements (one data point every minute) derived  
50 from the wireless sensor and the reference monitor were compared using the Bland and Altman  
51  
52  
53  
54  
55  
56  
57  
58  
59  
60

Method for repeated measurements[31]. This method was used to account for within-subject variation by correcting for the variance of differences between the average differences across patients and the number of measurements per patient. The mean difference ('bias') between the wireless sensor and reference monitor and the 95% LoA ( $\pm 1.96$  SD) was determined for both the HR and RR data. In addition, a Clarke Error Grid analysis was conducted to specify the clinical accuracy and the consequences for clinical decision making[32]. The time (hours) to first occurrence of data loss was analysed with Kaplan-Meier survival plots.

A power calculation was not feasible due to the lack of preliminary data with these continuous monitoring systems. Therefore, we aimed to analyze data of at least 25 patients - each with multiple hours of continuous data – which is sufficient to evaluate the validity of the wireless patch sensor.

## Results

From September 2015 to September 2016, a total of 33 postoperative patients entered the study. Data from the reference monitor were missing for eight patients due to technical issues with retrieving the data from the monitor's on-board memory, resulting in a total of 1568 hours of monitoring time with the reference monitor and 1702 hours of vital signs monitoring from the wireless sensor. Therefore, measurement pairs of 25 patients were available for agreement analysis. On average, 62 hours remained per patient for further analysis. The range of total monitoring time per patient varied from 12 to 124 hours. Table 1 summarizes patient characteristics and surgical procedures .

**Table 1.** Patient characteristics (n = 25)

| Characteristic                                                    | Value                          |
|-------------------------------------------------------------------|--------------------------------|
| Male gender - no (%)                                              | 18 (72)                        |
| Age (years) - median (IQR) [range]                                | 63.0 (57.8-71.5) [23.0 – 77.0] |
| Body Mass Index (BMI; kg/m <sup>2</sup> )* - median (IQR) [range] | 26.2 (24.2-29.4) [17.2 - 40.2] |
| <i>ASA score</i>                                                  |                                |
| 1-2 (%)                                                           | 8 (32)                         |
| 3-4 (%)                                                           | 17 (68)                        |
| <i>Comorbidities</i>                                              |                                |
| Hypertension - no (%)                                             | 8 (32)                         |
| Cardiovascular disease - no (%)                                   | 9 (36)                         |
| COPD - no (%)                                                     | 3 (12)                         |
| Diabetes - no (%)                                                 | 3 (12)                         |

IQR: interquartile range. COPD: Chronic Obstructive Pulmonary Disease. \* BMI of one patient was missing

### *Example of a patient measurement*

Figure 1 shows the HR and RR trend during the first four postoperative days of a 60-year-old male patient with extensive cardiac and vascular comorbidities, after an open nephrectomy procedure for a



1  
2  
3 suspected carcinoma in situ. Three events can be recognized: 1.) a sudden HR increase on Thursday  
4 evening; later diagnosed as atrial fibrillation, 2.) an episode of bradycardia on Saturday afternoon, and  
5 3.) mild tachycardia and a subtle increase in RR starting Sunday afternoon, caused by bleeding from  
6 an aortic branch artery. After coil embolization, the patient was readmitted to the Intensive Care Unit  
7 (ICU). This example illustrates agreement between HR and RR measurements recorded with the  
8 wireless sensor and the reference standard. Note that RR derived from the reference monitor was  
9 highly variable compared with RR from the wireless sensor (Figure 1).  
10

### 11 Heart rate

12  
13 Table 2 shows bias and precision (95% LoA) from comparisons between the wireless sensor and the  
14 reference standard. For analysis, 55565 minutes (926 h) of HR measurement pairs were available. The  
15 mean difference (bias) in HR was -1.1 beats/min (reference standard minus sensor) with a 95% LoA of  
16 -8.8 to 6.5 beats/min. Applying a 15 min median filter resulted in a narrower 95% LoA of -5.7  
17 beats/min to 3.2 beats/min (3986 minutes available for analysis). Bland and Altman plots for the  
18 complete and filtered HR datasets are shown in Figure 2a and 2b, respectively.  
19  
20

21 **Table 2** Bland Altman analysis of wireless heart rate and respiratory rate versus reference monitor in  
22 postoperative patients

| 23 Parameter                           | 24 Number of measurement pairs | 25 of Bias | 26 SD | 27 Lower LoA <sup>b</sup> | 28 95% Upper LoA <sup>b</sup> |
|----------------------------------------|--------------------------------|------------|-------|---------------------------|-------------------------------|
| 29 <i>Complete dataset</i>             |                                |            |       |                           |                               |
| 30 Heart rate                          | 31 55565                       | 32 -1,1    | 3,83  | -8,8                      | 6,5                           |
| 33 Respiratory rate                    | 34 56674                       | -2,3       | 6,8   | -15,8                     | 11,2                          |
| 35 <i>Filtered dataset<sup>d</sup></i> |                                |            |       |                           |                               |
| 36 Heart rate                          | 37 3986                        | -1,2       | 2,2   | -5,7                      | 3,2                           |
| 38 Respiratory rate                    | 39 4001                        | -2,4       | 4,2   | -10,8                     | 5,9                           |

40 <sup>a</sup> Dataset after applying a median filter

41 <sup>b</sup> LoA limits of agreement

### 42 Respiratory rate

43 The mean difference between the reference monitor and the wireless sensor was -2.3 breaths/min with  
44 wide levels of agreement (95% LoA: -15.8 to 11.2 breaths/min). The agreement between both methods  
45 improved after applying a 15 minute median filter, resulting in a 95% LoA of -10.8 to 5.9 breaths/min.  
46 Bland and Altman plots for the complete and filtered RR dataset are displayed in Figures 3a and 3b.  
47 Most 'high RR' outliers originated from the reference monitor and were observed in the higher RR  
48 range. This is also shown in Figure 1 where RR measurements derived from the reference monitor  
49 showed a higher variation compared with RR derived from the wireless sensor.  
50  
51

### 52 Diagnostic accuracy of the wireless sensor

53 Because of the relatively long monitoring time per patient and the high-risk population, we were able  
54 to capture several instances of bradycardia, tachycardia, bradypnea and tachypnea. The incidence of  
55 bradycardia was rare, a HR below 50 was present in only 2% of all HR measurements in the complete  
56 dataset. Tachycardia, bradypnea and tachypnea occurred more frequently in 14%, 15% and 34% of  
57  
58  
59  
60

cases respectively. Sensitivity, specificity, positive predictive value (PPV) and negative predictive value (NPV) are shown in Table 3. After applying median filtering, sensitivity and specificity of all episodes with abnormal HR and RR improved.

**Table 3** Diagnostic accuracy for bradypnea, tachypnea, bradycardia, tachycardia

|                               | True positives (%) | False positives (%) | True negatives (%) | False negatives (%) | Sensitivity (%) | Specificity (%) | PPV (%) | NPV (%) |
|-------------------------------|--------------------|---------------------|--------------------|---------------------|-----------------|-----------------|---------|---------|
| <i>Bradycardia</i>            |                    |                     |                    |                     |                 |                 |         |         |
| Complete dataset              | 824 (71)           | 363 (1)             | 55148 (99)         | 339 (1)             | 71              | 99              | 69      | 99      |
| Filtered dataset <sup>a</sup> | 24 (72)            | 0 (0)               | 3953 (100)         | 9 (0)               | 73              | 100             | 100     | 100     |
| <i>Tachycardia</i>            |                    |                     |                    |                     |                 |                 |         |         |
| Complete dataset              | 7111 (90)          | 1490 (3)            | 47321 (97)         | 752 (2)             | 90              | 97              | 83      | 98      |
| Filtered dataset <sup>a</sup> | 496 (98)           | 65 (2)              | 3413 (98)          | 12 (0)              | 98              | 98              | 88      | 100     |
| <i>Bradypnea</i>              |                    |                     |                    |                     |                 |                 |         |         |
| Complete dataset              | 2113 (24)          | 562 (1)             | 47438 (99)         | 6561 (12)           | 24              | 99              | 79      | 88      |
| Filtered dataset <sup>a</sup> | 134 (33)           | 8 (0)               | 3587 (100)         | 272 (7)             | 33              | 100             | 94      | 93      |
| <i>Tachypnea</i>              |                    |                     |                    |                     |                 |                 |         |         |
| Complete dataset              | 16210 (84)         | 14602 (39)          | 22694 (61)         | 3168 (12)           | 84              | 61              | 53      | 88      |
| Filtered dataset <sup>a</sup> | 1225 (94)          | 1029 (38)           | 1668 (62)          | 79 (5)              | 94              | 62              | 54      | 95      |

<sup>a</sup> Dataset after applying a median filter

The Clarke error grid analyses of the filtered datasets are shown in Figure 4a and 4b; it shows that 100% of the HR measurements and 99% of RR measurements are within region A or B, respectively within 20% of the reference measurement, or outside 20% of the reference but not leading to unnecessary treatment. None of the HR measurements were in region, B, C or E, which means that none of the measurements would lead to failure to treat, unnecessary treatment or confusion between bradycardia and tachycardia. Very few of the RR measurements ( $\leq 1\%$ ) were within region C, D or E, indicating a potentially dangerous failure to apply the right treatment.

### Technical performance

HR and RR data were recorded for the majority of the time (94%), from 36 sensors in 33 patients (Table 4). Nineteen (53%) wireless patient monitoring series had complete uninterrupted data, but in 17 patients there was data loss (ranging from 8s data loss to 60h). Most found sensor failure to be caused by a sawtooth pattern of the battery level from inadvertent covering of the air opening for the zinc-air battery resulting in measurement gaps.

**Table 4** Amount of data loss within all wireless sensor measurements

|  | Time loss (hours:minutes:seconds) |           |              |              |
|--|-----------------------------------|-----------|--------------|--------------|
|  | Total loss (%) <sup>a</sup>       | Mean loss | Minimum loss | Maximum loss |
|  |                                   |           |              |              |

|                                                             |                   |          |          |          |
|-------------------------------------------------------------|-------------------|----------|----------|----------|
| All wireless sensor measurements (n=36)                     | 101:15:24 (5.9%)  | 02:48:45 | 00:00:00 | 59:59:08 |
| Only wireless sensor measurements with any data loss (n=17) | 101:15:24 (15.5%) | 05:57:22 | 00:00:08 | 59:59:08 |

<sup>a</sup>Data loss is defined as time without data as percentage of the total time measured

Figure 5 shows the survival analysis for ‘time to first failure’ in data transmission of the sensor. Using a threshold (maximum duration of a gap in the data) of two minutes, this analysis showed that 63% of the wireless sensor measurements in patients were performed without data loss greater than two minutes. A gap duration of one hour resulted in 79% of sensor measurements without data loss greater than an hour.

## Discussion

We studied the performance of a wearable wireless sensor to measure HR and RR continuously in high-risk postoperative patients. The results show that this sensor (Healthpatch MD) can accurately measure HR with a deviation within 10% of the reference standard. In contrast, the accuracy for RR was outside the limit range we considered acceptable. However, this finding may be due to frequent outliers and clinically implausible variability of RR values provided by the reference monitor. Median filtering of both signals over a 15 min period resulted in a reduction of the number of RR measurement pairs outside the acceptable LoA and an improvement of LoA. Overall, data loss was limited with HR and RR measurements 94% of the time available.

### Strengths

To the best of our knowledge, this is the first clinical study that investigated the reliability and accuracy of continuous vital signs monitoring using a wearable wireless patch sensor for several days in postoperative surgical patients at a step-down unit. While some of the earlier feasibility studies that used continuous wireless monitoring were performed in hospital environments[24,29], most of the results were actually obtained under controlled laboratory conditions[25,27,33]. Other studies used intermittent nurse observations on the ward as the only reference[34,35]. Although these studies showed satisfactory agreement, they cannot validate the continuous performance of the retrieved data with the wireless devices. Moreover, these wireless monitoring devices are not intended to deliver ‘spot’ readings for EWS, i.e., their use was evaluated for a purpose outside the intended scope of use. Consequently, a drawback of these study designs was the inability to validate continuous HR and RR measurements of new remote monitoring devices in between nurse observations. In the current study reference HR and RR were measured continuously in a clinical setting.

### Limitations

The results of the present study confirm the difficulty of accurate continuous RR monitoring. However, we must consider the limitations of the reference standard[36,37]; accuracy of thoracic impedance RR measurements can be influenced by many factors independent of breathing, such as patient movement, talking and coughing. Impedance artefacts could explain the high number of false negatives (i.e., missed bradypnea), resulting in low sensitivity. In addition, the HealthPatch sensor was

not designed to indicate respiration rates  $< 5$  breaths/min. Nonetheless, a progressive slowing of breathing rate may still be identified and used as indicator of vital instability, for example to recognize life-threatening opioid-induced respiratory depression.

Impedance technique which is the current bedside routine standard for continuous measurement of HR and RR in most hospitals today and therefore clinically relevant. However, it cannot be considered a gold standard for RR measurement. While capnography is widely regarded as a 'true' gold standard for RR, it has several drawbacks for continuous unsupervised respiratory monitoring in spontaneously breathing patients, since its nasal cannula can be easily dislodged, leading to incomplete data and a high number of false positive 'apnea' alarms[38].

### *Filtering*

Applying a median filter over 15 minute data epochs improved reliability of HR and RR by removing outliers, for example, a transient very high RR caused by a movement artefact. This is appropriate since these transient artefacts (i.e., RR  $>45$  breaths/min) are extremely unlikely from a physiological perspective. Although filtering effectively eliminates such artifacts, this comes at the expense of reducing the number of available measurements and the reduced ability to detect sudden changes in vital signs (e.g., cardiac arrest). An alternative might be to use a 'moving' median filter to keep the update rate at once every minute or once every 2 min. On the other hand, improved elimination of outliers could result in a higher proportion of epochs with reliable HR and RR resulting in lower false positive alarms. The latter is extremely important if this remote monitoring system is to be clinically deployed on the ward or at home. Furthermore, continuous remote monitoring on the ward with a reduced frequency (i.e., once every 15 minutes) still provides much more information regarding the patient's vital signs than the current intermittent monitoring practice, where vital signs are usually only observed once every 8h nurse shift.

In case an alarm is generated by the remote monitoring system, a nurse can personally check on the patient and correct if the cause of the alarm was not related to a change in the patient's medical condition. However, it must be realized that a large number of false alarms is very disruptive on the general ward, especially when there is a low nurse to patient ratio (e.g., at night). This may even decrease patient safety by taking away valuable nursing time from patients who are in real need of attention. We suggest that eliminating outliers to improve reliability and eliminate false positive alerts far outweighs the limited benefits of having 'continuous' vital signs data streams.

### *'Methods comparison' methodology and continuous monitoring*

The goal of this study was to determine whether the wireless sensor is able to reliably measure RR and HR over time in postoperative patients. Although Bland and Altman analyses can reliably indicate bias and precision of 'spot measurements', it does not inform about the 'trending ability' of the monitoring system over time, while this is of ultimate importance to timely recognize abnormal vital sign patterns. This was also confirmed in the study of Churpek et al. that showed the added value of using trends of vital signs for detecting clinical deterioration on the wards[21]. In our study, the example case in Figure 1 clearly demonstrates the ability of the wireless sensor to detect important physiological

1  
2  
3 changes of a deteriorating patient over time, even while the limits of agreement for detecting  
4 bradypnea as determined by Bland Altman analyses were deemed not acceptable. Therefore, we wish  
5 to emphasize that accurate trend measurements (e.g., the ability to detect deterioration over time) is  
6 more important than just one accurate single measurement at one specific point in time.  
7

8  
9 Continuous monitoring on the general ward is still unknown territory. Future studies should therefore  
10 focus on the performance of wireless monitoring in patients at the general ward, including validation  
11 during periods of mobilization. Particular emphasis should be on the early detection of critical adverse  
12 events. However, the usability and patient perspective on remote monitoring are important to  
13 determine when creating the infrastructure of a complete remote monitoring solution.  
14

### 15 **Conclusion**

16 Wireless continuous monitoring of HR and RR have the potential to contribute to early recognition of  
17 physiological decline in high-risk patients. However, the wireless sensor studied here needs further  
18 improvement to allow early recognition of progressive slowing of breathing patterns. Optimizing the  
19 signal processing algorithms to reduce artefacts and to prevent disruptive false alarms are necessary to  
20 be able to use wireless vital signs monitoring as a patient safety net.  
21  
22

### 23 **Contributors**

24 MB, CK, DD and TB were involved in the clinical trial design and ethics submission. EH was  
25 involved in the planning and conduct of the study and drafting of the results. MB assisted in the  
26 conduct of the study, performed analysis of clinical data and drafted the paper. Throughout the study,  
27 LL, KL, CK and TB assisted in the conduct of the study. All authors reviewed and approved the final  
28 version of the manuscript.  
29  
30

### 31 **Funding**

32 This research was funded solely from institutional funds.  
33  
34

### 35 **Competing interests**

36 At the time of the study, MB was part-time employee of FocusCura (Health IT company, Driebergen-  
37 Zeist, The Netherlands) and DD is founder and CEO of FocusCura. No funding from FocusCura was  
38 obtained. VitalConnect Inc, the manufacturer of the HealthPatch MD sensor, neither had insight or  
39 influence on the analysis of the data or drafting of the manuscript.  
40  
41

### 42 **Data sharing statement**

43 Authors are planning upon producing further publications using this dataset. Afterwards, anonymized  
44 patient recordings will be available from the corresponding author upon request.  
45  
46  
47

### 48 **References**

- 49  
50 1 Fuhrmann L, Lippert A, Perner A, *et al*. Incidence, staff awareness and mortality of patients at risk on general wards.  
51  
52  
53  
54  
55  
56  
57  
58  
59  
60

- 1  
2  
3  
4  
5  
6  
7  
8  
9  
10  
11  
12  
13  
14  
15  
16  
17  
18  
19  
20  
21  
22  
23  
24  
25  
26  
27  
28  
29  
30  
31  
32  
33  
34  
35  
36  
37  
38  
39  
40  
41  
42  
43  
44  
45  
46  
47  
48  
49  
50  
51  
52  
53  
54  
55  
56  
57  
58  
59  
60
- Resuscitation* 2008;**77**:325–30. doi:10.1016/j.resuscitation.2008.01.009
- 2 Kause J, Smith G, Prytherch D, *et al*. A comparison of Antecedents to Cardiac Arrests, Deaths and Emergency Intensive care Admissions in Australia and New Zealand, and the United Kingdom—the ACADEMIA study. *Resuscitation* 2004;**62**:275–82. doi:10.1016/j.resuscitation.2004.05.016
- 3 Sax FL, Charlson ME. Medical patients at high risk for catastrophic deterioration. *Crit Care Med* 1987;**15**:510–5.
- 4 Jonsson T, Jonsdottir H, Möller AD, *et al*. Nursing documentation prior to emergency admissions to the intensive care unit. *Nurs Crit Care* 2011;**16**:164–9. doi:10.1111/j.1478-5153.2011.00427.x
- 5 McQuillan P, Pilkington S, Allan A, *et al*. Confidential inquiry into quality of care before admission to intensive care. *BMJ* 1998;**316**:1853–8.
- 6 Calzavacca P, Licari E, Tee A, *et al*. The impact of Rapid Response System on delayed emergency team activation patient characteristics and outcomes—A follow-up study. *Resuscitation* 2010;**81**:31–5. doi:10.1016/j.resuscitation.2009.09.026
- 7 Ghaferi AA, Birkmeyer JD, Dimick JB. Variation in hospital mortality associated with inpatient surgery. *N Engl J Med* 2009;**361**:1368–75. doi:10.1056/NEJMsa0903048
- 8 Taenzer AH, Pyke JB, McGrath SP. A Review of Current and Emerging Approaches to Address Failure-to-Rescue. *Anesthesiology* 2011;**115**:421–31. doi:10.1097/ALN.0b013e318219d633
- 9 Ferraris VA, Bolanos M, Martin JT, *et al*. Identification of Patients With Postoperative Complications Who Are at Risk for Failure to Rescue. *JAMA Surgery* 2014;**149**:1103. doi:10.1001/jamasurg.2014.1338
- 10 Trinkle RM, Flabouris A. Documenting Rapid Response System afferent limb failure and associated patient outcomes. *Resuscitation* 2011;**82**:810–4. doi:10.1016/j.resuscitation.2011.03.019
- 11 Hammer JA, Jones TL, Brown SA. Rapid response teams and failure to rescue: one community's experience. *J Nurs Care Qual* 2012;**27**:352–8. doi:10.1097/NCQ.0b013e31825a8e2f
- 12 Hillman K, Chen J, Cretikos M, *et al*. Introduction of the medical emergency team (MET) system: a cluster-randomised controlled trial. *Lancet* 2005;**365**:2091–7. doi:10.1016/S0140-6736(05)66733-5
- 13 Pajarón-Guerrero M, Fernández-Miera MF, Dueñas-Puebla JC, *et al*. Early Discharge Programme on Hospital-at-Home Evaluation for Patients with Immediate Postoperative Course after Laparoscopic Colorectal Surgery. *Eur Surg Res* 2017;**58**:263–73. doi:10.1159/000479004
- 14 Roulin D, Donadini A, Gander S, *et al*. Cost-effectiveness of the implementation of an enhanced recovery protocol for colorectal surgery. *Br J Surg* 2013;**100**:1108–14. doi:10.1002/bjs.9184
- 15 Gustafsson UO, Scott MJ, Schwenk W, *et al*. Guidelines for Perioperative Care in Elective Colonic Surgery: Enhanced Recovery After Surgery (ERAS®) Society Recommendations. *World J Surg* 2012;**37**:259–84. doi:10.1007/s00268-012-1772-0
- 16 Buist M, Bernard S, Nguyen TV, *et al*. Association between clinically abnormal observations and subsequent in-hospital mortality: a prospective study. *Resuscitation* 2004;**62**:137–41. doi:10.1016/j.resuscitation.2004.03.005
- 17 Churpek MM, Yuen TC, Huber MT, *et al*. Predicting cardiac arrest on the wards: a nested case-control study. *Chest* 2012;**141**:1170–6. doi:10.1378/chest.11-1301
- 18 Cuthbertson BH, Boroujerdi M, McKie L, *et al*. Can physiological variables and early warning scoring systems allow early recognition of the deteriorating surgical patient? *Crit Care Med* 2007;**35**:402–9. doi:10.1097/01.CCM.0000254826.10520.87

- 1  
2  
3 19 Hollis RH, Graham LA, Lazenby JP, *et al.* A Role for the Early Warning Score in Early Identification of Critical  
4 Postoperative Complications. *Ann Surg* 2016;**263**:918–23. doi:10.1097/SLA.0000000000001514
- 5 20 Goldhill DR, White SA, Sumner A. Physiological values and procedures in the 24 h before ICU admission from the  
6 ward. *Anaesthesia* 1999;**54**:529–34.
- 7  
8 21 Churpek MM, Adhikari R, Edelson DP. The value of vital sign trends for detecting clinical deterioration on the wards.  
9 *Resuscitation* 2016;**102**:1–5. doi:10.1016/j.resuscitation.2016.02.005
- 10 22 Watkins T, Whisman L, Booker P. Nursing assessment of continuous vital sign surveillance to improve patient safety  
11 on the medical/surgical unit. *Journal of Clinical Nursing* 2016;**25**:278–81. doi:10.1111/jocn.13102
- 12  
13 23 Selvaraj N. Long-term Remote Monitoring of Vital Signs using a Wireless Patch Sensor. 2014;:1–4.
- 14 24 Hernandez-Silveira M, Ahmed K, Ang S-S, *et al.* Assessment of the feasibility of an ultra-low power, wireless digital  
15 patch for the continuous ambulatory monitoring of vital signs. *BMJ Open* 2015;**5**:e006606–6. doi:10.1136/bmjopen-  
16 2014-006606
- 17  
18 25 Chan AM, Selvaraj N, Ferdosi N, *et al.* Wireless patch sensor for remote monitoring of heart rate, respiration, activity,  
19 and falls. *Conf Proc IEEE Eng Med Biol Soc* 2013;**2013**:6115–8. doi:10.1109/EMBC.2013.6610948
- 20 26 Yasuma F, Hayano J-I. Respiratory sinus arrhythmia: why does the heartbeat synchronize with respiratory rhythm?  
21 *Chest* 2004;**125**:683–90.
- 22  
23 27 Chan AM, Ferdosi N, Narasimhan R. Ambulatory respiratory rate detection using ECG and a triaxial accelerometer.  
24 *Conf Proc IEEE Eng Med Biol Soc* 2013;**2013**:4058–61. doi:10.1109/EMBC.2013.6610436
- 25  
26 28 Healthcare S. Data Sheet Ultraview SL. 2016.
- 27  
28 29 Ben-Ari J, Zimlichman E, Adi N, *et al.* Contactless respiratory and heart rate monitoring: validation of an innovative  
29 tool. *J Med Eng Technol* 2010;**34**:393–8. doi:10.3109/03091902.2010.503308
- 30 30 Smith GB, Prytherch DR, Meredith P, *et al.* The ability of the National Early Warning Score (NEWS) to discriminate  
31 patients at risk of early cardiac arrest, unanticipated intensive care unit admission, and death. *Resuscitation*  
32 2013;**84**:465–70. doi:10.1016/j.resuscitation.2012.12.016
- 33  
34 31 Bland JM, Altman DG. Agreement between methods of measurement with multiple observations per individual. *J*  
35 *Biopharm Stat* 2007;**17**:571–82. doi:10.1080/10543400701329422
- 36 32 Clarke WL, Cox D, Gonder-Frederick LA, *et al.* Evaluating clinical accuracy of systems for self-monitoring of blood  
37 glucose. *Diabetes Care* 1987;**10**:622–8.
- 38  
39 33 Selvaraj N. Long-term Remote Monitoring of Vital Signs using a Wireless Patch Sensor. 2014;:1–4.
- 40 34 Weenk M, van Goor H, Frietman B, *et al.* Continuous Monitoring of Vital Signs Using Wearable Devices on the  
41 General Ward: Pilot Study. *JMIR Mhealth Uhealth* 2017;**5**:e91. doi:10.2196/mhealth.7208
- 42  
43 35 Granholm A, Pedersen NE, Lippert A, *et al.* Respiratory rates measured by a standardised clinical approach, ward  
44 staff, and a wireless device. *Acta Anaesthesiol Scand* 2016;**60**:1444–52. doi:10.1111/aas.12784
- 45 36 Freundlich JJ, Erickson JC. Electrical impedance pneumography for simple nonrestrictive continuous monitoring of  
46 respiratory rate, rhythm and tidal volume for surgical patients. *Chest* 1974;**65**:181–4.
- 47  
48 37 Wiklund L, Hök B, Ståhl K, *et al.* Postanesthesia monitoring revisited: frequency of true and false alarms from  
49 different monitoring devices. *J Clin Anesth* 1994;**6**:182–8.
- 50  
51 38 Macknet M, Kimball-Jones P, Applegate R II, *et al.* Accuracy of a novel bioacoustic sensor for monitoring respiratory

1  
2  
3 rate. *European Journal of Anaesthesiology* 2007;24:34. doi:10.1097/00003643-200706001-00124  
4  
5  
6  
7  
8  
9  
10  
11  
12  
13  
14  
15  
16  
17  
18  
19  
20  
21  
22  
23  
24  
25  
26  
27  
28  
29  
30  
31  
32  
33  
34  
35  
36  
37  
38  
39  
40  
41  
42  
43  
44  
45  
46  
47  
48  
49  
50  
51  
52  
53  
54  
55  
56  
57  
58  
59  
60

For peer review only



## Figure titles and legends

**Figure 1** Example of a patient that is being measured for four days continuously with the wireless sensor (red) and reference standard (blue). The upper panel shows heart rate in beats per minute, the lower shows respiratory rate in breaths per minute.

**Figure 2** Bland and Altman plots for complete (a) and filtered (b) datasets for heart rate during admission at the surgical step-down unit with few (white) to many (dark red) measurement pairs

**Figure 3** Bland and Altman plots for complete (a) and filtered (b) datasets for respiratory rate during admission at the surgical step-down unit with few (white) to many (dark red) measurement pairs

**Figure 4** Clark error grid analysis to quantify clinical accuracy of the HR and RR measurements with the HealthPatch MD as compared to the reference monitor of the filtered dataset. Region (A) are points within 20% of the reference monitor, region (B) contains points outside 20% of the reference, but not leading to unnecessary treatment, region (C) are points leading to unnecessary treatment, region (D) indicates a potentially dangerous failure to detect bradycardia or tachycardia (a) or bradypnea or tachypnea (b), region (E) represents points where events are confused (e.g., bradycardia with bradypnea).

**Figure 5** Survival analysis of 36 wireless sensor measurements in 33 patients versus time with various threshold times (maximum duration of a gap in the data). Data loss longer than the threshold counts as failure. The vertical marks indicate the end of a measurement other than failure (i.e., when the patient is being discharged to the ward and data transmission stopped).

**Appendix 1** The HealthPatch MD consists of an adhesive patch (with 1-lead ECG and a Zinc-air battery) and a sensor module. BLE: Bluetooth Low Energy; bpm: beats per minute; brpm: breaths per minute

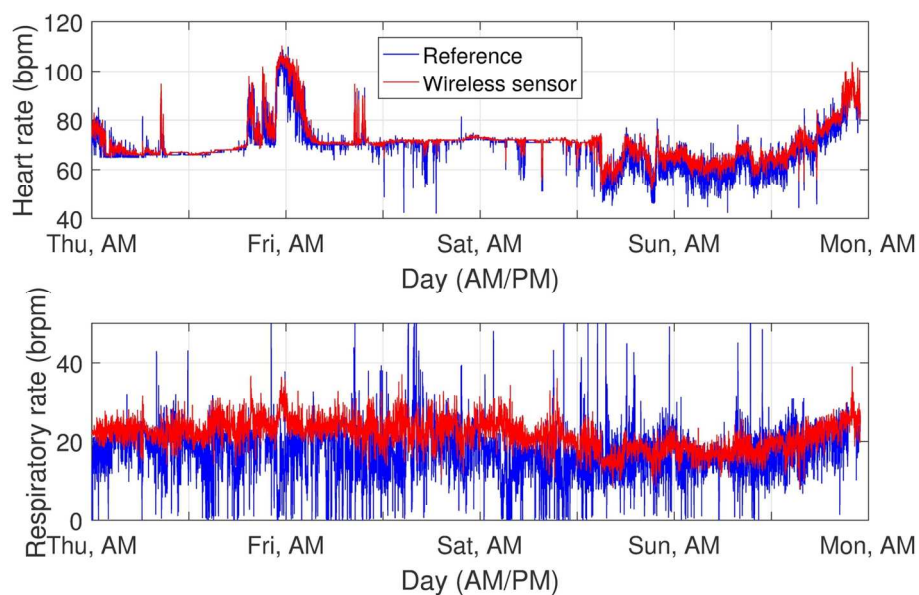

Example of a patient that is being measured for four days continuously with the wireless sensor (red) and reference standard (blue). The upper panel shows heart rate in beats per minute, the lower shows respiratory rate in breaths per minute.

140x89mm (300 x 300 DPI)

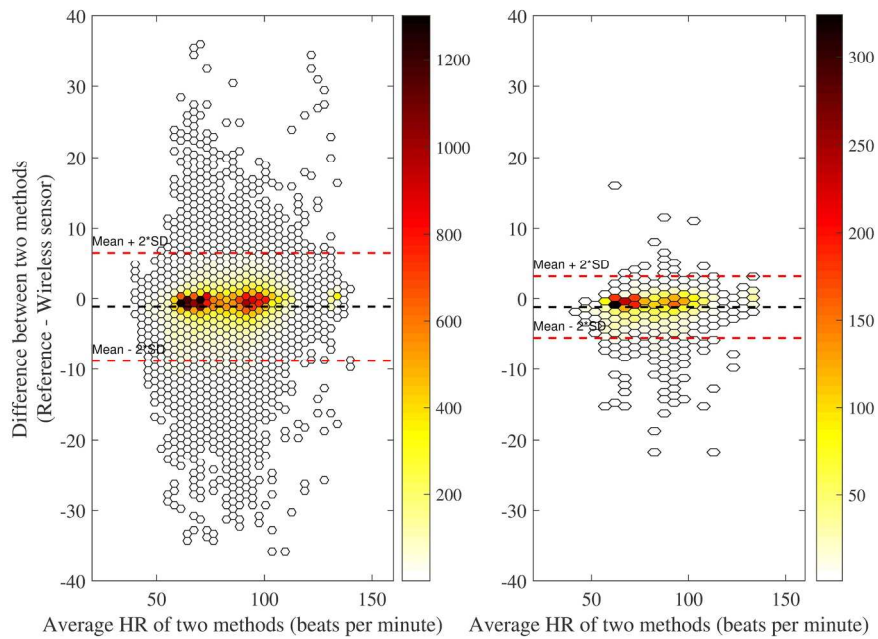

Bland and Altman plots for complete (a) and filtered (b) datasets for heart rate during admission at the surgical step-down unit with few (white) to many (dark red) measurement pairs

192x133mm (300 x 300 DPI)

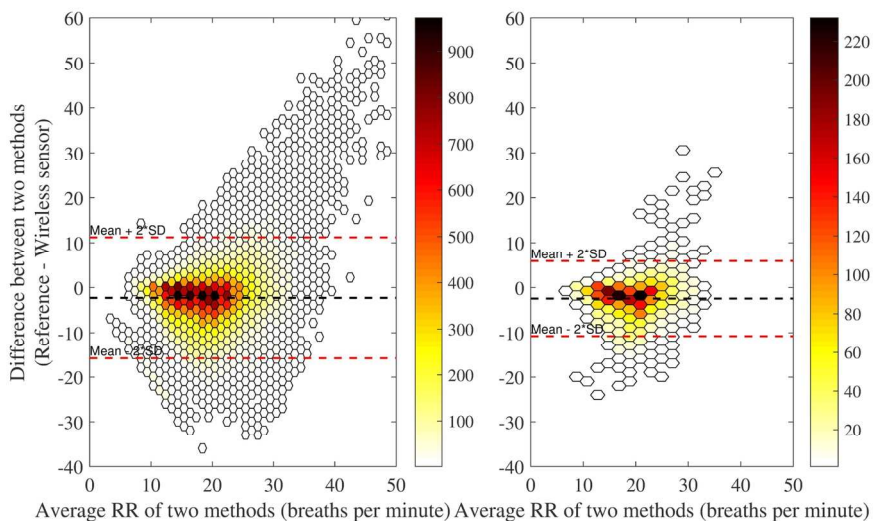

Bland and Altman plots for complete (a) and filtered (b) datasets for respiratory rate during admission at the surgical step-down unit with few (white) to many (dark red) measurement pairs

152x84mm (300 x 300 DPI)

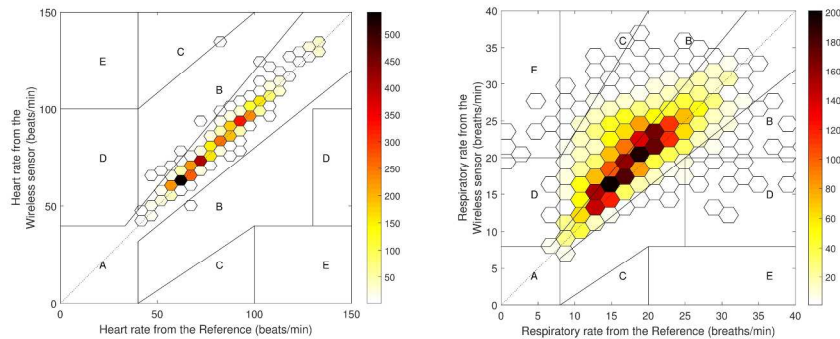

Clark error grid analysis to quantify clinical accuracy of the HR and RR measurements with the HealthPatch MD as compared to the reference monitor of the filtered dataset. Region (A) are points within 20% of the reference monitor, region (B) contains points outside 20% of the reference, but not leading to unnecessary treatment, region (C) are points leading to unnecessary treatment, region (D) indicates a potentially dangerous failure to detect bradycardia or tachycardia (a) or bradypnea or tachypnea (b), region (E) represents points where events are confused (e.g., bradycardia with bradypnea).

286x161mm (300 x 300 DPI)

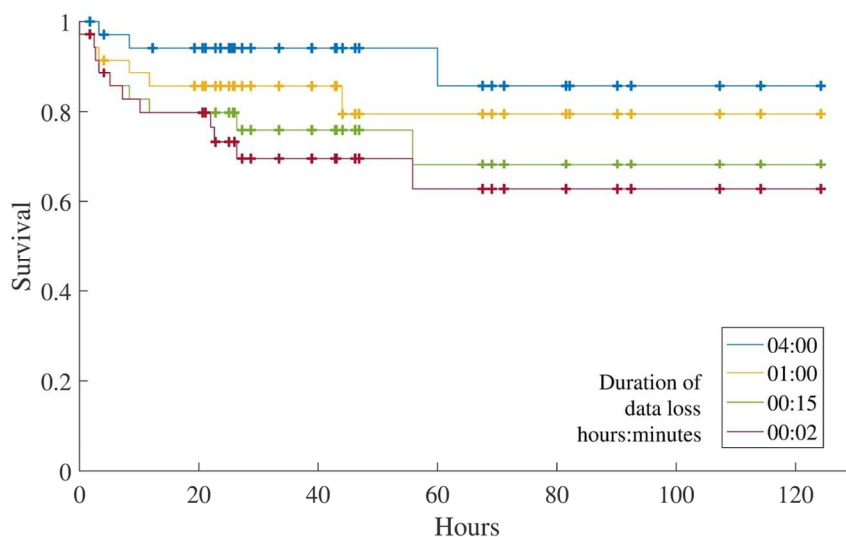

Survival analysis of 36 wireless sensor measurements in 33 patients versus time with various threshold times (maximum duration of a gap in the data). Data loss longer than the threshold counts as failure. The vertical marks indicate the end of a measurement other than failure (i.e., when the patient is being discharged to the ward and data transmission stopped).

122x68mm (300 x 300 DPI)

view only

1  
2  
3  
4  
5  
6  
7  
8  
9  
10  
11  
12  
13  
14  
15  
16  
17  
18  
19  
20  
21  
22  
23  
24  
25  
26  
27  
28  
29  
30  
31  
32  
33  
34  
35  
36  
37  
38  
39  
40  
41  
42  
43  
44  
45  
46  
47  
48  
49  
50  
51  
52  
53  
54  
55  
56  
57  
58  
59  
60

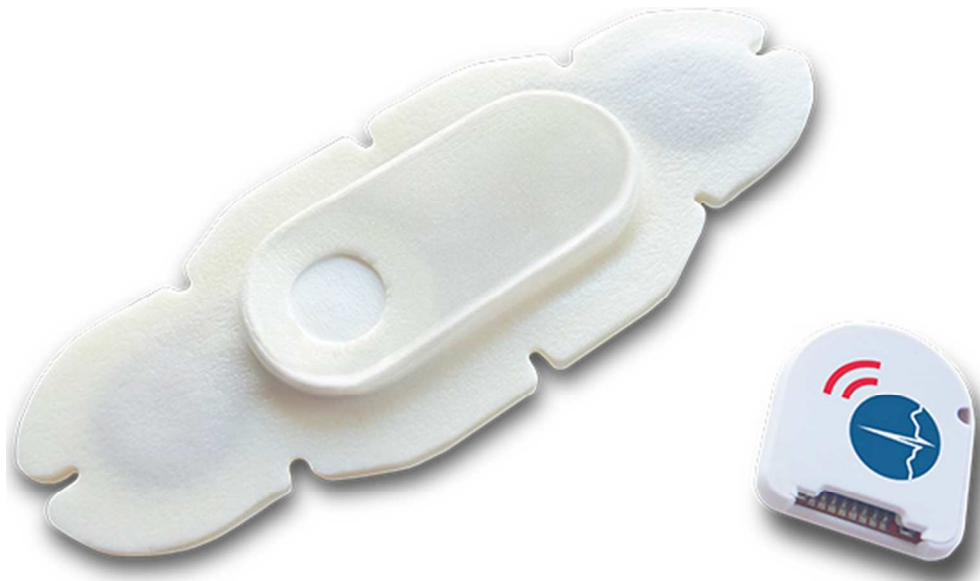

211x123mm (72 x 72 DPI)

Review only

# BMJ Open

## Reliability of wireless monitoring using a wearable patch sensor in high-risk surgical patients at a step-down unit in the Netherlands: a clinical validation study

|                                 |                                                                                                                                                                                                                                                                                                                                                                                                                                 |
|---------------------------------|---------------------------------------------------------------------------------------------------------------------------------------------------------------------------------------------------------------------------------------------------------------------------------------------------------------------------------------------------------------------------------------------------------------------------------|
| Journal:                        | <i>BMJ Open</i>                                                                                                                                                                                                                                                                                                                                                                                                                 |
| Manuscript ID                   | bmjopen-2017-020162.R1                                                                                                                                                                                                                                                                                                                                                                                                          |
| Article Type:                   | Research                                                                                                                                                                                                                                                                                                                                                                                                                        |
| Date Submitted by the Author:   | 27-Dec-2017                                                                                                                                                                                                                                                                                                                                                                                                                     |
| Complete List of Authors:       | Breteler, Martine; Universitair Medisch Centrum Utrecht, Department of Anesthesiology<br>Huizinga, Erik; Universitair Medisch Centrum Utrecht, Anesthesiology<br>van Loon, Kim; Univ Med Ctr Utrecht, Anesthesiology<br>Leenen, Luke; University Medical Centre Utrecht, Trauma<br>Dohmen, Daan; FocusCura<br>Kalkman, Cor; UMC Utrecht, Anesthesiology<br>Blokhuis, Taco; Universitair Medisch Centrum Utrecht, Trauma Surgery |
| <b>Primary Subject Heading</b>: | Surgery                                                                                                                                                                                                                                                                                                                                                                                                                         |
| Secondary Subject Heading:      | Nursing                                                                                                                                                                                                                                                                                                                                                                                                                         |
| Keywords:                       | Telemedicine < BIOTECHNOLOGY & BIOINFORMATICS, Vital signs, Wireless technology, Remote monitoring, Continuous monitoring                                                                                                                                                                                                                                                                                                       |
|                                 |                                                                                                                                                                                                                                                                                                                                                                                                                                 |

SCHOLARONE™  
Manuscripts

only



1  
2  
3  
4  
5 **Reliability of wireless monitoring using a wearable patch sensor in high-**  
6 **risk surgical patients at a step-down unit in the Netherlands: a clinical**  
7 **validation study**  
8  
9  
10  
11  
12

13  
14 M.J.M. Breteler<sup>1,3</sup>, E. Huizinga<sup>1</sup>, K. van Loon<sup>1</sup>, L.P.H. Leenen<sup>2</sup>, D.A.J. Dohmen<sup>3</sup>, C.J.  
15 Kalkman<sup>1</sup>, T. J. Blokhuis<sup>2,4</sup>  
16

17  
18 <sup>1</sup>Department of Anesthesiology, University Medical Center Utrecht, Utrecht University, The  
19 Netherlands

20 <sup>2</sup>Department of Trauma Surgery, University Medical Center Utrecht, Utrecht, The  
21 Netherlands

22 <sup>3</sup>FocusCura, Driebergen-Rijsenburg, The Netherlands

23 <sup>4</sup>Department of Surgery, Maastricht University Medical Center, Maastricht, The Netherlands  
24  
25  
26

27 *Corresponding author:*

28 Martine Breteler

29 University Medical Center Utrecht, Mailstop Q.04.2.313

30 P.O. Box 85500, 3508 GA Utrecht, The Netherlands

31 Email: [m.j.m.breteler@umcutrecht.nl](mailto:m.j.m.breteler@umcutrecht.nl)

32 Phone: +31 6 47306841  
33  
34  
35  
36  
37  
38  
39  
40  
41  
42  
43  
44  
45  
46  
47  
48  
49  
50  
51  
52  
53  
54  
55  
56  
57  
58  
59  
60

Word count: 3911

## ABSTRACT

**Background and objectives:** Intermittent vital signs measurements are the current standard on hospital wards, typically recorded once every 8h. Early signs of deterioration may therefore be missed. Recent innovations have resulted in ‘wearable’ sensors, which may capture patient deterioration at an earlier stage. The objective of this study was to determine whether a wireless ‘patch’ sensor is able to reliably measure respiratory and heart rate continuously in high-risk surgical patients. The secondary objective was to explore the potential of the wireless sensor to serve as a safety monitor.

**Design:** In an observational methods comparisons study, patients were measured with both the wireless sensor and bedside routine standard for at least 24 hours.

**Setting:** University teaching hospital, single center.

**Participants:** Twenty-five postoperative surgical patients admitted to a step-down unit.

**Outcome measures:** Primary outcome were limits of agreement and bias of heart rate and respiratory rate. Secondary outcome measures were sensor reliability, defined as time until first occurrence of data loss.

**Results:** 1568 hours of vital signs data were analyzed. Bias and 95% limits of agreement for heart rate were -1.1 (-8.8 to 6.5) beats per minute. For respiration rate, bias was -2.3 breaths per minute with wide limits of agreement (-15.8 to 11.2 breaths per minute). Median filtering over a 15 minute period improved limits of agreement of both respiration and heart rate. Sixty-three% of the measurements were performed without data loss greater than two minutes. Overall data loss was limited (6% of time).

**Conclusions:** The wireless sensor is capable of accurately measuring heart rate, but accuracy for respiratory rate was outside acceptable limits. Remote monitoring has the potential to contribute to early recognition of physiological decline in high-risk patients. Future studies should focus on the ability to detect patient deterioration on low care environments and at home after discharge.

**Keywords:** telemedicine; vital signs; wireless technology, remote monitoring, continuous monitoring

## STRENGTHS AND LIMITATIONS OF THIS STUDY

- We validated the accuracy of a wireless patch sensor to measure heart and respiratory rate in the intended target population for remote wireless monitoring: post-surgical patients at high risk for complications.
- Monitoring was continued for several days.
- The reference standard was an ‘ICU-grade’ patient monitoring system.
- Although used in clinical practice, the accuracy of the respiratory rate from the reference standard (thoracic impedance pneumography) has known limitations.
- The Bland and Altman methods comparison approach is not ideal for time series data; a test for ‘trending ability’ is desirable.

## INTRODUCTION

While technological advances have resulted in numerous new diagnostic tools and therapeutic innovations, we are still not able to timely recognize patient deterioration on general hospital wards[1,2]. This contributes to avoidable cardiopulmonary arrest, unplanned admission to the intensive care unit (ICU), an increase in hospitalization costs and detrimental effects on quality of life[3-7]. To timely detect patient deterioration, we may benefit from technical solutions that can track patients' vital signs continuously.

Intermittent vital signs measurements, typically once every nurse shift of eight hours, are the current routine monitoring practice on general hospital wards. As a result, patient deterioration in between measurements can be easily missed. In an attempt to improve the detection of patient deterioration, Early Warning Scoring (EWS) protocols and Medical Emergency Teams (METs) have been implemented in most hospitals around the globe. However, failure-to-rescue events continue to occur even with these systems in place[8,9]. This phenomenon is also known as failure of the 'afferent limb' of the EWS system[10-12]. Alongside the attempts to improve detection of patient deterioration on the ward, there is a trend to reduce the duration of hospitalization by discharging patients home early, for example in 'enhanced recovery after surgery' (ERAS) programs[13-15]. Once a patient is back home, EWS protocols and vital signs monitoring are no longer available. Recovery within the patient's own home environment has many advantages, but unavoidably some surgical complications will now become first manifest in the home setting. This increases the risk that patient deterioration will be recognized too late.

The majority of adverse events are preceded by a significant period of change in vital signs[16-20]. Early recognition of the deteriorating patient might be improved if continuous remote monitoring would become available for at-risk patients in 'low care' environments such as the regular hospital ward or in the first few 'critical' days at home after hospital discharge[21,22]. Recent technological innovations have resulted in lightweight 'wearable' wireless sensors capable of recording and transmitting several vital signs such as heart rate (HR), respiration rate (RR), temperature and patient movement. While the majority of the wearable sensors is strictly 'consumer-grade', some manufacturers have obtained CE and/or FDA approval for use in clinical environments. However, validity and accuracy of these so called 'medical-grade' wearables has not been extensively assessed in real clinical environments. Two studies reported satisfactory agreement between heart rate, respiration rate of a wearable patch sensor and their respective reference devices. However, these measurements were obtained from healthy participants in controlled conditions. Another study showed reliable heart rates and respiration rates with a wearable patch sensor in the majority of patients, but these data was limited to short periods of measurements in patients with comorbid conditions[23-25]. As such, we cannot translate these findings accordingly to patients in a clinical environment at risk for complications.

The objective of this study was to determine whether a wireless adhesive 'patch' sensor is able to reliably measure RR and HR continuously in patients after high-risk surgery. We aimed to verify whether wireless sensor technology is robust and capable of detecting physiological trend patterns in

1  
2  
3 high-risk patients before introducing wireless vital signs monitoring into clinical practice. A secondary  
4 objective was to explore the potential of the wireless sensor to serve as a safety monitor in clinical  
5 practice.  
6  
7

## 8 **Materials & Methods**

9

### 10 **Study design and setting**

11  
12 We performed a methods comparisons study with an observational design in which patients were  
13 continuously monitored after high-risk surgery during the initial days of recovery at the surgical step-  
14 down unit (SDU) of the University Medical Center Utrecht, the Netherlands, a large academic  
15 hospital. Formal approval for this study was obtained from the local ethical committee (number  
16 15/550).  
17

### 18 **Study participants**

19

20 Postoperative patients were asked to participate upon admission to the SDU if their expected stay was  
21 at least 24 hours. These patients were considered for enrolment because they represent a high-risk  
22 subset of surgical patients that is more prone to experience deterioration compared to patients on the  
23 general ward. Exclusion criteria were patients with an implantable cardiac device, an allergy to  
24 adhesives, wound or skin lesion near the application site, or inability to give informed consent. After  
25 written informed consent was obtained, researchers applied the sensor to the patient's chest to start  
26 recording vital signs for one to three days using the wearable sensor and the routine monitoring system  
27 described hereafter.  
28  
29

#### 30 *Description of the wireless wearable sensor*

31 The HealthPatch® MD (VitalConnect Inc, San Jose, CA, USA) is a medical-grade lightweight,  
32 wireless and wearable adhesive biosensor that measures a number of vital signs continuously: single-  
33 lead electrocardiogram (ECG), HR, heart rate variability, RR, skin temperature, body posture and step  
34 count. It was designed to facilitate long-term remote monitoring of vital signs and activity metrics  
35 within the hospital environment as well as in the post-discharge period at home. The sensor consists of  
36 a disposable adhesive patch that houses two ECG electrodes, a thermistor and a zinc-air coin-cell  
37 battery. The reusable sensor module contains a triaxial accelerometer and Bluetooth Low Energy  
38 (BLE) transceiver (see Appendix 1). The patch can be applied on the patient's chest and measures  
39 vital signs continuously up to three days (four days if continuous transmission of its single lead ECG  
40 waveform is disabled). The module processes the incoming signals and transmits the data via BLE to a  
41 relay device (for this study we used an iPad mini (Apple, Inc. Cupertino, CA, USA) with the  
42 'Healthwatch' (VitalConnect Inc, San Jose, CA, USA) mobile application. This application can  
43 display vital signs data in real-time for research purposes, but was not designed to be used as clinical  
44 monitoring system. Also, near real-time data can be viewed on the Healthwatch Web cloud based  
45 server, to monitor long-term trends. Quality of the sensor data was verified several times by the  
46 researchers during data collection. Patient identification information was not entered on the mobile  
47 device to ensure privacy protection.  
48  
49  
50  
51  
52  
53  
54  
55  
56  
57  
58  
59  
60

1  
2  
3 Although the wireless sensor can also measure position, in this study we only focused on assessing the  
4 accuracy and reliability of RR and HR monitoring. The sensor calculates HR using analysis of the  
5 single-lead ECG. The algorithm is based on automated detection of QRS complexes from the ECG  
6 waveforms. RR is derived from the combined information from three sources: an embedded algorithm  
7 uses a weighted average of two characteristics of the ECG signal: 1.) QRS amplitude modulation and  
8 2.) respiratory sinus arrhythmia (RSA); both ECG-derived signals change during inspiration and  
9 expiration[26], and the algorithm uses 3.) accelerometer data produced by chest movement during  
10 respiration [27]. Both HR and RR are updated every 4 s and the manufacturer states an accuracy of  $\pm 3$   
11 breaths per minute (breaths/min), in the range of 4 to 42 breaths for RR. The stated accuracy of HR is  
12  $\pm 5$  beats per minute (beats/min) or 10% (whichever is greater), in the range of 30-200 beats/min.  
13  
14

#### 15 *Description of the bedside routine standard*

16 HR and RR of patients were continuously monitored with the wearable sensor and simultaneously  
17 with a multiparameter bedside monitoring system designed for use in ICU's and Operating Rooms  
18 (XPREZZON, Spacelabs Healthcare, Snoqualmie, Washington DC, USA) which served as the  
19 reference monitor. This reference uses ECG for HR detection and measures RR by thoracic impedance  
20 pneumography.  
21  
22

#### 23 **Signal analysis**

24 The raw data transmitted by the sensor containing the measurements and their associated time stamps  
25 were retrieved in CSV format. Data were stored and processed using Matlab (The MathWorks Inc.,  
26 Natick, MA, USA). Empty or invalid data ('not-a-number') were removed to obtain continuous 2D  
27 vectors of vital sign samples with their corresponding time stamps. Data reports were automatically  
28 retrieved from the reference monitor. These contained vital signs data sampled once per minute (i.e.,  
29 one measurement was saved and transmitted every minute). The sensor data, originally transmitted  
30 once every four seconds was therefore resampled to once per minute (i.e., one sample per minute of  
31 the sensor was retained corresponding to the nearest time point of the reference monitor) to produce  
32 paired data points with the reference monitor. Furthermore, sensor data and reference data were  
33 synchronized to ensure alignment of their respective time stamps. No artifact removal was applied to  
34 the data before analysis.  
35  
36  
37

38 Besides the analysis on vital signs data transmitted every minute, a median filter over a 15-minute  
39 period was applied to study the effect on HR and RR outliers and to further explore the potential of the  
40 wireless sensor in clinical practice. This filtering was calculated as a median over subsequent epochs  
41 of 15 minutes.  
42  
43

#### 44 **Outcomes**

45 The primary outcome was bias and precision (95% Limits of Agreement; LoA) of HR and RR of the  
46 wireless sensor compared to the bedside monitor. This reference standard reports an accuracy for HR  
47 of  $\pm 1\%$  or 3 beats/min (whichever is greater) and an accuracy of  $\pm 5\%$  or 1 breaths/min (whichever is  
48 greater) for RR[28]. We considered HR and RR to be acceptable for clinical purposes if within  $\pm 10\%$   
49 of the reference monitor or  $\pm 3$  breaths/min or  $\pm 5$  beats/min[29]. A secondary endpoint was the  
50  
51  
52  
53  
54  
55  
56  
57  
58  
59  
60

reliability of detecting true critical clinical conditions such as bradycardia (HR < 50 beats/min), tachycardia (HR > 100 beats/min), bradypnea (RR < 12 breaths/min) and tachypnea (RR > 20 breaths/min)[30]. Another secondary outcome was the reliability defined as time until the first occurrence of data loss (defined as a duration of a gap within the data of 2 minutes, 15 minutes, 1 hour or 4 hours) and the overall amount of data loss from various causes.

### *Statistical analysis*

The series of observation pairs of HR and RR measurements (one data point every minute) derived from the wireless sensor and the reference monitor were compared using the Bland and Altman Method for repeated measurements[31]. This method was used to account for within-subject variation by correcting for the variance of differences between the average differences across patients and the number of measurements per patient. The mean difference ('bias') between the wireless sensor and reference monitor and the 95% LoA ( $\pm 1.96$  SD) was determined for both the HR and RR data. In addition, a Clarke Error Grid analysis was conducted to specify the clinical accuracy and the consequences for clinical decision making[32]. The time (hours) to first occurrence of data loss was analysed with Kaplan-Meier survival plots.

A power calculation was not feasible due to the lack of preliminary data with these continuous monitoring systems. Therefore, we aimed to analyze data of at least 25 patients - each with multiple hours of continuous data – which is sufficient to evaluate the validity of the wireless patch sensor.

## **Results**

From September 2015 to September 2016, a total of 33 postoperative patients entered the study. Data from the reference monitor were missing for eight patients due to technical issues with retrieving the data from the monitor's on-board memory, resulting in a total of 1568 hours of monitoring time with the reference monitor and 1702 hours of vital signs monitoring from the wireless sensor. Therefore, measurement pairs of 25 patients were available for agreement analysis. On average, 62 hours remained per patient for further analysis. The range of total monitoring time per patient varied from 12 to 124 hours. Table 1 summarizes patient characteristics and surgical procedures .

**Table 1.** Patient characteristics (n = 25)

| <b>Characteristic</b>                                             | <b>Value</b>                   |
|-------------------------------------------------------------------|--------------------------------|
| Male gender - number (%)                                          | 18 (72)                        |
| Age (years) - median (IQR) [range]                                | 63.0 (57.8-71.5) [23.0 – 77.0] |
| Body Mass Index (BMI; kg/m <sup>2</sup> )* - median (IQR) [range] | 26.2 (24.2-29.4) [17.2 - 40.2] |
| <i>ASA score</i>                                                  |                                |
| 1-2 (%)                                                           | 8 (32)                         |
| 3-4 (%)                                                           | 17 (68)                        |
| <i>Comorbidities</i>                                              |                                |
| Hypertension - no (%)                                             | 8 (32)                         |

|                                 |        |
|---------------------------------|--------|
| Cardiovascular disease - no (%) | 9 (36) |
| COPD - no (%)                   | 3 (12) |
| Diabetes - no (%)               | 3 (12) |

IQR: interquartile range. COPD: Chronic Obstructive Pulmonary Disease. \* BMI of one patient was missing

### Example of a patient measurement

Figure 1 shows the HR and RR trend during the first four postoperative days of a 60-year-old male patient with extensive cardiac and vascular comorbidities, after an open nephrectomy procedure for a suspected carcinoma in situ. Three events can be recognized: 1.) a sudden HR increase on Thursday evening; later diagnosed as atrial fibrillation, 2.) an episode of bradycardia on Saturday afternoon, and 3.) mild tachycardia and a subtle increase in RR starting Sunday afternoon, caused by bleeding from an aortic branch artery. After coil embolization, the patient was readmitted to the Intensive Care Unit (ICU). This example illustrates agreement between HR and RR measurements recorded with the wireless sensor and the reference standard. Note that RR derived from the reference monitor was highly variable compared with RR from the wireless sensor (Figure 1).

### Heart rate

Table 2 shows bias and precision (95% LoA) from comparisons between the wireless sensor and the reference standard. For analysis, 55565 minutes (926 h) of HR measurement pairs were available. The mean difference (bias) in HR was -1.1 beats/min (reference standard minus sensor) with a 95% LoA of -8.8 to 6.5 beats/min. Applying a 15 min median filter resulted in a narrower 95% LoA of -5.7 beats/min to 3.2 beats/min (3986 minutes available for analysis). Bland and Altman plots for the complete and filtered HR datasets are shown in Figure 2a and 2b, respectively.

**Table 2** Bland Altman analysis of wireless heart rate and respiratory rate versus reference monitor in postoperative patients

| Parameter                           | Number of measurement pairs | Bias | SD   | Lower LoA <sup>b</sup> | 95% Upper LoA <sup>b</sup> |
|-------------------------------------|-----------------------------|------|------|------------------------|----------------------------|
| <i>Complete dataset</i>             |                             |      |      |                        |                            |
| Heart rate                          | 55565                       | -1,1 | 3,83 | -8,8                   | 6,5                        |
| Respiratory rate                    | 56674                       | -2,3 | 6,8  | -15,8                  | 11,2                       |
| <i>Filtered dataset<sup>a</sup></i> |                             |      |      |                        |                            |
| Heart rate                          | 3986                        | -1,2 | 2,2  | -5,7                   | 3,2                        |
| Respiratory rate                    | 4001                        | -2,4 | 4,2  | -10,8                  | 5,9                        |

<sup>a</sup> Dataset after applying a median filter

<sup>b</sup> LoA limits of agreement

### Respiratory rate

The mean difference between the reference monitor and the wireless sensor was -2.3 breaths/min with wide levels of agreement (95% LoA: -15.8 to 11.2 breaths/min). The agreement between both methods improved after applying a 15 minute median filter, resulting in a 95% LoA of -10.8 to 5.9 breaths/min. Bland and Altman plots for the complete and filtered RR dataset are displayed in Figures 3a and 3b.

Most 'high RR' outliers originated from the reference monitor and were observed in the higher RR range. This is also shown in Figure 1 where RR measurements derived from the reference monitor showed a higher variation compared with RR derived from the wireless sensor. This high variation reduced after applying a median filter over 15-minutes.

### Diagnostic accuracy of the wireless sensor

Because of the relatively long monitoring time per patient and the high-risk population, we were able to capture several instances of bradycardia, tachycardia, bradypnea and tachypnea. The incidence of bradycardia was rare, a HR below 50 was present in only 2% of all HR measurements in the complete dataset. Tachycardia, bradypnea and tachypnea occurred more frequently in 14%, 15% and 34% of cases respectively. Sensitivity, specificity, positive predictive value (PPV) and negative predictive value (NPV) are shown in Table 3. After applying median filtering, sensitivity and specificity of all episodes with abnormal HR and RR improved.

**Table 3** Diagnostic accuracy for bradypnea, tachypnea, bradycardia, tachycardia

|                               | True positives (%) | False positives (%) | True negatives (%) | False negatives (%) | Sensitivity (%) | Specificity (%) | PPV (%) | NPV (%) |
|-------------------------------|--------------------|---------------------|--------------------|---------------------|-----------------|-----------------|---------|---------|
| <i>Bradycardia</i>            |                    |                     |                    |                     |                 |                 |         |         |
| Complete dataset              | 824 (71)           | 363 (1)             | 55148 (99)         | 339 (1)             | 71              | 99              | 69      | 99      |
| Filtered dataset <sup>a</sup> | 24 (72)            | 0 (0)               | 3953 (100)         | 9 (0)               | 73              | 100             | 100     | 100     |
| <i>Tachycardia</i>            |                    |                     |                    |                     |                 |                 |         |         |
| Complete dataset              | 7111 (90)          | 1490 (3)            | 47321 (97)         | 752 (2)             | 90              | 97              | 83      | 98      |
| Filtered dataset <sup>a</sup> | 496 (98)           | 65 (2)              | 3413 (98)          | 12 (0)              | 98              | 98              | 88      | 100     |
| <i>Bradypnea</i>              |                    |                     |                    |                     |                 |                 |         |         |
| Complete dataset              | 2113 (24)          | 562 (1)             | 47438 (99)         | 6561 (12)           | 24              | 99              | 79      | 88      |
| Filtered dataset <sup>a</sup> | 134 (33)           | 8 (0)               | 3587 (100)         | 272 (7)             | 33              | 100             | 94      | 93      |
| <i>Tachypnea</i>              |                    |                     |                    |                     |                 |                 |         |         |
| Complete dataset              | 16210 (84)         | 14602 (39)          | 22694 (61)         | 3168 (12)           | 84              | 61              | 53      | 88      |
| Filtered dataset <sup>a</sup> | 1225 (94)          | 1029 (38)           | 1668 (62)          | 79 (5)              | 94              | 62              | 54      | 95      |

<sup>a</sup> Dataset after applying a median filter

The Clarke error grid analyses of the filtered datasets are shown in Figure 4a and 4b; it shows that 100% of the HR measurements and 99% of RR measurements are within region A or B, respectively within 20% of the reference measurement, or outside 20% of the reference but not leading to unnecessary treatment. None of the HR measurements were in region, B, C or E, which means that none of the measurements would lead to failure to treat, unnecessary treatment or confusion between bradycardia and tachycardia. Very few of the RR measurements ( $\leq 1\%$ ) were within region C, D or E, indicating a potentially dangerous failure to apply the right treatment.



### Technical performance

HR and RR data were recorded for the majority of the time (94%), from 36 sensors in 33 patients (Table 4). Nineteen (53%) wireless patient monitoring series had complete uninterrupted data, but in 17 patients there was data loss (ranging from 8s data loss to 60h). Most found sensor failure to be caused by a sawtooth pattern of the battery level from inadvertent covering of the air opening for the zinc-air battery resulting in measurement gaps.

**Table 4** Amount of data loss within all wireless sensor measurements

|                                                             | Time loss (hours:minutes:seconds) |           |              |              |
|-------------------------------------------------------------|-----------------------------------|-----------|--------------|--------------|
|                                                             | Total loss (%) <sup>a</sup>       | Mean loss | Minimum loss | Maximum loss |
| All wireless sensor measurements (n=36)                     | 101:15:24 (5.9%)                  | 02:48:45  | 00:00:00     | 59:59:08     |
| Only wireless sensor measurements with any data loss (n=17) | 101:15:24 (15.5%)                 | 05:57:22  | 00:00:08     | 59:59:08     |

<sup>a</sup>Data loss is defined as time without data as percentage of the total time measured

Figure 5 shows the survival analysis for ‘time to first failure’ in data transmission of the sensor. Using a threshold (maximum duration of a gap in the data) of two minutes, this analysis showed that 63% of the wireless sensor measurements in patients were performed without data loss greater than two minutes. A gap duration of one hour resulted in 79% of sensor measurements without data loss greater than an hour.

### Discussion

We studied the performance of a wearable wireless sensor to measure HR and RR continuously in high-risk postoperative patients. The results show that this sensor (Healthpatch MD) can accurately measure HR with a deviation within 10% of the reference standard. In contrast, the accuracy for RR was outside the limit range we considered acceptable. However, this finding may be due to frequent outliers and clinically implausible variability of RR values provided by the reference monitor. Median filtering of both signals over a 15 min period resulted in a reduction of the number of RR measurement pairs outside the acceptable LoA and an improvement of LoA. Overall, data loss was limited with HR and RR measurements 94% of the time available.

#### Strengths

To the best of our knowledge, this is the first clinical study that investigated the reliability and accuracy of continuous vital signs monitoring using a wearable wireless patch sensor for several days in postoperative surgical patients at a step-down unit. Most studies were actually obtained under controlled laboratory conditions[25,27,33]. These studies demonstrated the ability of the HealthPatch sensor to accurately measure HR and RR in adult participants. Hernandez et al. [24] reported a higher accuracy for HR and RR measurements with the SensiumVitals digital patch in stable patients with comorbid conditions for a limited time period (2h) compared to our study. Other studies used intermittent nurse observations on the ward as the only reference. Weenk et al. [34] reported that both HR and RR of the HealthPatch were in agreement with nurse measurements, although wide limits of

1  
2  
3 agreement were found. Another study compared RR measurements of nurses with readings from the  
4 SensiumVitals digital patch and found inadequate agreement [35]. Although these studies showed the  
5 feasibility of wireless technology in clinical practice, comparison with nurse readings cannot validate  
6 the continuous performance of the wireless devices. Moreover, these wireless monitoring devices are  
7 not intended to deliver ‘spot’ readings for EWS, i.e., their use was evaluated for a purpose outside the  
8 intended scope of use. Consequently, a drawback of these study designs was the inability to validate  
9 continuous HR and RR measurements of new remote monitoring devices in between nurse  
10 observations. In the current study reference HR and RR were measured continuously in a clinical  
11 setting.  
12

### 13 14 *Limitations*

15 The results of the present study confirm the difficulty of accurate continuous RR monitoring.  
16 However, we should also consider the limitations of the reference standard[36,37]; accuracy of  
17 thoracic impedance RR measurements can be influenced by many factors independent of breathing,  
18 such as patient movement, talking and coughing. Impedance artefacts could explain the high number  
19 of false negatives (i.e., missed bradypnea), resulting in low sensitivity. Impedance technique which is  
20 the current bedside routine standard for continuous measurement of HR and RR in most hospitals  
21 today and therefore clinically relevant. However, it cannot be considered a gold standard for RR  
22 measurement. While capnography is widely regarded as a ‘true’ gold standard for RR, it has several  
23 drawbacks for continuous unsupervised respiratory monitoring in spontaneously breathing patients,  
24 since its nasal cannula can be easily dislodged, leading to incomplete data and a high number of false  
25 positive ‘apnea’ alarms[38]. Furthermore, the HealthPatch sensor was not designed to indicate  
26 respiration rates < 5 breaths/min. Nonetheless, a progressive slowing of breathing rate may still be  
27 identified and used as indicator of vital instability, for example to recognize life-threatening opioid-  
28 induced respiratory depression.  
29  
30  
31

### 32 33 *Filtering*

34 Applying a median filter over 15 minute data epochs improved reliability of HR and RR by removing  
35 outliers, for example, a transient very high RR caused by a movement artefact. This is appropriate  
36 since these transient artefacts (i.e., RR >45 breaths/min) are extremely unlikely from a physiological  
37 perspective. Although filtering effectively eliminates such artifacts, this comes at the expense of  
38 reducing the number of available measurements and the reduced ability to detect sudden changes in  
39 vital signs (e.g., cardiac arrest). An alternative might be to use a ‘moving’ median filter to keep the  
40 update rate at once every minute or once every 2 min. On the other hand, improved elimination of  
41 outliers could result in a higher proportion of epochs with reliable HR and RR resulting in lower false  
42 positive alarms. The latter is extremely important if this remote monitoring system is to be clinically  
43 deployed on the ward or at home. Furthermore, continuous remote monitoring on the ward with a  
44 reduced frequency (i.e., once every 15 minutes) still provides much more information regarding the  
45 patient’s vital signs than the current intermittent monitoring practice, where vital signs are usually  
46 only observed once every 8h nurse shift.  
47  
48  
49  
50  
51  
52  
53  
54  
55  
56  
57  
58  
59  
60

1  
2  
3 In case an alarm is generated by the remote monitoring system, a nurse can personally check on the  
4 patient and correct if the cause of the alarm was not related to a change in the patient's medical  
5 condition. However, it must be realized that a large number of false alarms is very disruptive on the  
6 general ward, especially when there is a low nurse to patient ratio (e.g., at night). This may even  
7 decrease patient safety by taking away valuable nursing time from patients who are in real need of  
8 attention. We suggest that eliminating outliers to improve reliability and eliminate false positive alerts  
9 far outweighs the limited benefits of having 'continuous' vital signs data streams.  
10

#### 11 *'Methods comparison' methodology and continuous monitoring*

12  
13 The goal of this study was to determine whether the wireless sensor is able to reliably measure RR and  
14 HR over time in postoperative patients. Although Bland and Altman analyses can reliably indicate bias  
15 and precision of 'spot measurements', it does not inform about the 'trending ability' of the monitoring  
16 system over time, while this is of ultimate importance to timely recognize abnormal vital sign patterns.  
17 This was also confirmed in the study of Churpek et al. that showed the added value of using trends of  
18 vital signs for detecting clinical deterioration on the wards[21]. In our study, the example case in  
19 Figure 1 clearly demonstrates the ability of the wireless sensor to detect important physiological  
20 changes of a deteriorating patient over time, even while the limits of agreement for detecting  
21 bradypnea as determined by Bland Altman analyses were deemed not acceptable. Therefore, we wish  
22 to emphasize that accurate trend measurements (e.g., the ability to detect deterioration over time) is  
23 more important than just one accurate single measurement at one specific point in time.  
24  
25  
26

27 Continuous monitoring on the general ward is still unknown territory. Future studies should therefore  
28 focus on the performance of wireless monitoring in patients at the general ward, including validation  
29 during periods of mobilization. Particular emphasis should be on the early detection of critical adverse  
30 events. However, the usability and patient perspective on remote monitoring are important to  
31 determine when creating the infrastructure of a complete remote monitoring solution.  
32  
33

#### 34 **Conclusion**

35 Wireless continuous monitoring may have the potential to contribute to early recognition of  
36 physiological decline in high-risk patients. The tested wireless sensor was able to accurately record  
37 heart rate, but the accuracy of respiratory rate needs further optimization to reduce the incidence of  
38 false alarms and allow timely recognition of altered breathing patterns.  
39  
40

#### 41 **Contributors**

42 MB, CK, DD and TB were involved in the clinical trial design and ethics submission. EH was  
43 involved in the planning and conduct of the study and drafting of the results. MB assisted in the  
44 conduct of the study, performed analysis of clinical data and drafted the paper. Throughout the study,  
45 LL, KL, CK and TB assisted in the conduct of the study. All authors reviewed and approved the final  
46 version of the manuscript.  
47  
48

#### 49 **Funding**

50 This research was funded solely from institutional funds.  
51  
52  
53  
54  
55  
56  
57  
58  
59  
60

### Competing interests

At the time of the study, MB was part-time employee of FocusCura (Health IT company, Driebergen-Zeist, The Netherlands) and DD is founder and CEO of FocusCura. No funding from FocusCura was obtained. To ensure independent analysis, the wearable sensor (HealthPatch MD) was purchased from VitalConnect Inc, the manufacturer of the HealthPatch MD. VitalConnect Inc, neither had insight or influence on the analysis of the data or drafting of the manuscript.

### Data sharing statement

Authors are planning upon producing further publications using this dataset. Afterwards, anonymized patient recordings will be available from the corresponding author upon request.

### References

- 1 Fuhrmann L, Lippert A, Perner A, *et al*. Incidence, staff awareness and mortality of patients at risk on general wards. *Resuscitation* 2008;**77**:325–30. doi:10.1016/j.resuscitation.2008.01.009
- 2 Kause J, Smith G, Prytherch D, *et al*. A comparison of Antecedents to Cardiac Arrests, Deaths and Emergency Intensive care Admissions in Australia and New Zealand, and the United Kingdom—the ACADEMIA study. *Resuscitation* 2004;**62**:275–82. doi:10.1016/j.resuscitation.2004.05.016
- 3 Sax FL, Charlson ME. Medical patients at high risk for catastrophic deterioration. *Crit Care Med* 1987;**15**:510–5.
- 4 Jonsson T, Jonsdottir H, Möller AD, *et al*. Nursing documentation prior to emergency admissions to the intensive care unit. *Nurs Crit Care* 2011;**16**:164–9. doi:10.1111/j.1478-5153.2011.00427.x
- 5 McQuillan P, Pilkington S, Allan A, *et al*. Confidential inquiry into quality of care before admission to intensive care. *BMJ* 1998;**316**:1853–8.
- 6 Calzavacca P, Licari E, Tee A, *et al*. The impact of Rapid Response System on delayed emergency team activation patient characteristics and outcomes—A follow-up study. *Resuscitation* 2010;**81**:31–5. doi:10.1016/j.resuscitation.2009.09.026
- 7 Ghaferi AA, Birkmeyer JD, Dimick JB. Variation in hospital mortality associated with inpatient surgery. *N Engl J Med* 2009;**361**:1368–75. doi:10.1056/NEJMs0903048
- 8 Taenzer AH, Pyke JB, McGrath SP. A Review of Current and Emerging Approaches to Address Failure-to-Rescue. *Anesthesiology* 2011;**115**:421–31. doi:10.1097/ALN.0b013e318219d633
- 9 Ferraris VA, Bolanos M, Martin JT, *et al*. Identification of Patients With Postoperative Complications Who Are at Risk for Failure to Rescue. *JAMA Surgery* 2014;**149**:1103. doi:10.1001/jamasurg.2014.1338
- 10 Trinkle RM, Flabouris A. Documenting Rapid Response System afferent limb failure and associated patient outcomes. *Resuscitation* 2011;**82**:810–4. doi:10.1016/j.resuscitation.2011.03.019
- 11 Hammer JA, Jones TL, Brown SA. Rapid response teams and failure to rescue: one community's experience. *J Nurs Care Qual* 2012;**27**:352–8. doi:10.1097/NCQ.0b013e31825a8e2f
- 12 Hillman K, Chen J, Cretikos M, *et al*. Introduction of the medical emergency team (MET) system: a cluster-randomised controlled trial. *Lancet* 2005;**365**:2091–7. doi:10.1016/S0140-6736(05)66733-5

- 1  
2  
3 13 Pajarón-Guerrero M, Fernández-Miera MF, Dueñas-Puebla JC, *et al.* Early Discharge Programme on Hospital-at-Home Evaluation for Patients with Immediate Postoperative Course after Laparoscopic Colorectal Surgery. *Eur Surg Res* 2017;**58**:263–73. doi:10.1159/000479004
- 4  
5  
6 14 Roulin D, Donadini A, Gander S, *et al.* Cost-effectiveness of the implementation of an enhanced recovery protocol for colorectal surgery. *Br J Surg* 2013;**100**:1108–14. doi:10.1002/bjs.9184
- 7  
8  
9 15 Gustafsson UO, Scott MJ, Schwenk W, *et al.* Guidelines for Perioperative Care in Elective Colonic Surgery: Enhanced Recovery After Surgery (ERAS®) Society Recommendations. *World J Surg* 2012;**37**:259–84. doi:10.1007/s00268-012-1772-0
- 10  
11  
12 16 Buist M, Bernard S, Nguyen TV, *et al.* Association between clinically abnormal observations and subsequent in-hospital mortality: a prospective study. *Resuscitation* 2004;**62**:137–41. doi:10.1016/j.resuscitation.2004.03.005
- 13  
14  
15 17 Churpek MM, Yuen TC, Huber MT, *et al.* Predicting cardiac arrest on the wards: a nested case-control study. *Chest* 2012;**141**:1170–6. doi:10.1378/chest.11-1301
- 16  
17 18 Cuthbertson BH, Boroujerdi M, McKie L, *et al.* Can physiological variables and early warning scoring systems allow early recognition of the deteriorating surgical patient? *Crit Care Med* 2007;**35**:402–9. doi:10.1097/01.CCM.0000254826.10520.87
- 18  
19  
20 19 Hollis RH, Graham LA, Lazenby JP, *et al.* A Role for the Early Warning Score in Early Identification of Critical Postoperative Complications. *Ann Surg* 2016;**263**:918–23. doi:10.1097/SLA.0000000000001514
- 21  
22  
23 20 Goldhill DR, White SA, Sumner A. Physiological values and procedures in the 24 h before ICU admission from the ward. *Anaesthesia* 1999;**54**:529–34.
- 24  
25  
26 21 Churpek MM, Adhikari R, Edelson DP. The value of vital sign trends for detecting clinical deterioration on the wards. *Resuscitation* 2016;**102**:1–5. doi:10.1016/j.resuscitation.2016.02.005
- 27  
28  
29 22 Watkins T, Whisman L, Booker P. Nursing assessment of continuous vital sign surveillance to improve patient safety on the medical/surgical unit. *Journal of Clinical Nursing* 2016;**25**:278–81. doi:10.1111/jocn.13102
- 30  
31  
32 23 Selvaraj N. Long-term Remote Monitoring of Vital Signs using a Wireless Patch Sensor. Health Innovation Conference (HIC) 2014;IEEE:83–86.
- 33  
34  
35 24 Hernandez-Silveira M, Ahmed K, Ang S-S, *et al.* Assessment of the feasibility of an ultra-low power, wireless digital patch for the continuous ambulatory monitoring of vital signs. *BMJ Open* 2015;**5**:e006606–6. doi:10.1136/bmjopen-2014-006606
- 36  
37  
38 25 Chan AM, Selvaraj N, Ferdosi N, *et al.* Wireless patch sensor for remote monitoring of heart rate, respiration, activity, and falls. *Conf Proc IEEE Eng Med Biol Soc* 2013;**2013**:6115–8. doi:10.1109/EMBC.2013.6610948
- 39  
40  
41 26 Yasuma F, Hayano J-I. Respiratory sinus arrhythmia: why does the heartbeat synchronize with respiratory rhythm? *Chest* 2004;**125**:683–90.
- 42  
43  
44 27 Chan AM, Ferdosi N, Narasimhan R. Ambulatory respiratory rate detection using ECG and a triaxial accelerometer. *Conf Proc IEEE Eng Med Biol Soc* 2013;**2013**:4058–61. doi:10.1109/EMBC.2013.6610436
- 45  
46  
47 28 Healthcare S. Data Sheet Ultraview SL. 2016.
- 48  
49  
50 29 Ben-Ari J, Zimlichman E, Adi N, *et al.* Contactless respiratory and heart rate monitoring: validation of an innovative tool. *J Med Eng Technol* 2010;**34**:393–8. doi:10.3109/03091902.2010.503308
- 51  
52  
53 30 Smith GB, Prytherch DR, Meredith P, *et al.* The ability of the National Early Warning Score (NEWS) to discriminate patients at risk of early cardiac arrest, unanticipated intensive care unit admission, and death. *Resuscitation* 2013;**84**:465–70. doi:10.1016/j.resuscitation.2012.12.016
- 54  
55  
56  
57  
58  
59  
60

- 1  
2  
3 31 Bland JM, Altman DG. Agreement between methods of measurement with multiple observations per individual. *J Biopharm Stat* 2007;**17**:571–82. doi:10.1080/10543400701329422
- 4  
5 32 Clarke WL, Cox D, Gonder-Frederick LA, *et al*. Evaluating clinical accuracy of systems for self-monitoring of blood  
6 glucose. *Diabetes Care* 1987;**10**:622–8.
- 7  
8 33 Selvaraj N. Long-term Remote Monitoring of Vital Signs using a Wireless Patch Sensor. 2014;:1–4.
- 9  
10 34 Weenk M, van Goor H, Frietman B, *et al*. Continuous Monitoring of Vital Signs Using Wearable Devices on the  
11 General Ward: Pilot Study. *JMIR Mhealth Uhealth* 2017;**5**:e91. doi:10.2196/mhealth.7208
- 12  
13 35 Granholm A, Pedersen NE, Lippert A, *et al*. Respiratory rates measured by a standardised clinical approach, ward  
14 staff, and a wireless device. *Acta Anaesthesiol Scand* 2016;**60**:1444–52. doi:10.1111/aas.12784
- 15  
16 36 Freundlich JJ, Erickson JC. Electrical impedance pneumography for simple nonrestrictive continuous monitoring of  
17 respiratory rate, rhythm and tidal volume for surgical patients. *Chest* 1974;**65**:181–4.
- 18  
19 37 Wiklund L, Hök B, Ståhl K, *et al*. Postanesthesia monitoring revisited: frequency of true and false alarms from  
20 different monitoring devices. *J Clin Anesth* 1994;**6**:182–8.
- 21  
22 38 Macknet M, Kimball-Jones P, Applegate R II, *et al*. Accuracy of a novel bioacoustic sensor for monitoring respiratory  
23 rate. *European Journal of Anaesthesiology* 2007;**24**:34. doi:10.1097/00003643-200706001-00124
- 24  
25  
26  
27  
28  
29  
30  
31  
32  
33  
34  
35  
36  
37  
38  
39  
40  
41  
42  
43  
44  
45  
46  
47  
48  
49  
50  
51  
52  
53  
54  
55  
56  
57  
58  
59  
60

## Figure titles and legends

**Figure 1** Example of a patient that is being measured for four days continuously with the wireless sensor (red) and reference standard (blue). The upper panel shows heart rate in beats per minute, the lower shows respiratory rate in breaths per minute.

**Figure 2** Bland and Altman plots for complete (a) and filtered (b) datasets for heart rate during admission at the surgical step-down unit with few (white) to many (dark red) measurement pairs

**Figure 3** Bland and Altman plots for complete (a) and filtered (b) datasets for respiratory rate during admission at the surgical step-down unit with few (white) to many (dark red) measurement pairs

**Figure 4** Clark error grid analysis to quantify clinical accuracy of the HR (a) and RR (b) measurements with the HealthPatch MD as compared to the reference monitor of the filtered dataset. Region (A) are points within 20% of the reference monitor, region (B) contains points outside 20% of the reference, but not leading to unnecessary treatment, region (C) are points leading to unnecessary treatment, region (D) indicates a potentially dangerous failure to detect bradycardia or tachycardia (a) or bradypnea or tachypnea (b), region (E) represents points where events are confused (e.g., bradycardia with bradypnea).

**Figure 5** Survival analysis of 36 wireless sensor measurements in 33 patients versus time with various threshold times (maximum duration of a gap in the data). Data loss longer than the threshold counts as failure. The vertical marks indicate the end of a measurement other than failure (i.e., when the patient is being discharged to the ward and data transmission stopped).

**Appendix 1** The HealthPatch MD consists of an adhesive patch (with 1-lead ECG and a Zinc-air battery) and a sensor module. BLE: Bluetooth Low Energy; bpm: beats per minute; brpm: breaths per minute



Example of a patient that is being measured for four days continuously with the wireless sensor (red) and reference standard (blue). The upper panel shows heart rate in beats per minute, the lower shows respiratory rate in breaths per minute.

140x89mm (300 x 300 DPI)



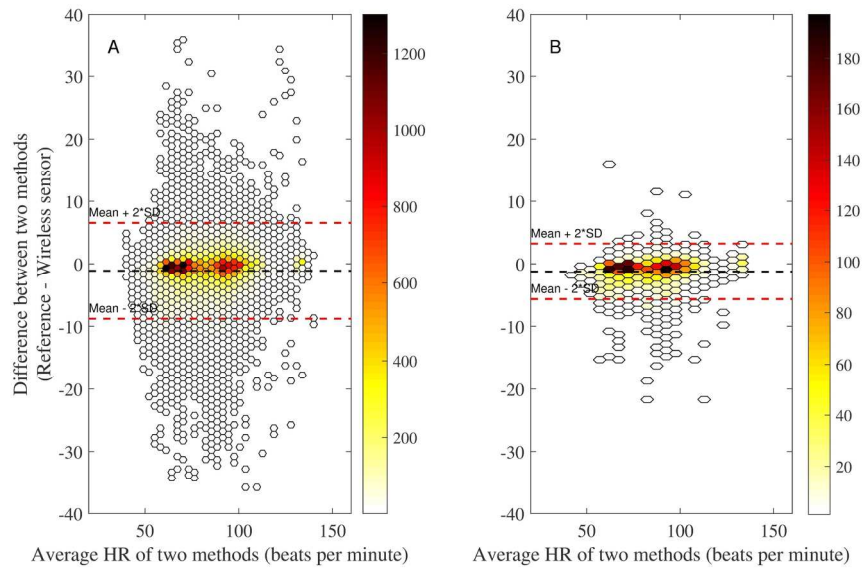

Bland and Altman plots for complete (a) and filtered (b) datasets for heart rate during admission at the surgical step-down unit with few (white) to many (dark red) measurement pairs

179x110mm (300 x 300 DPI)

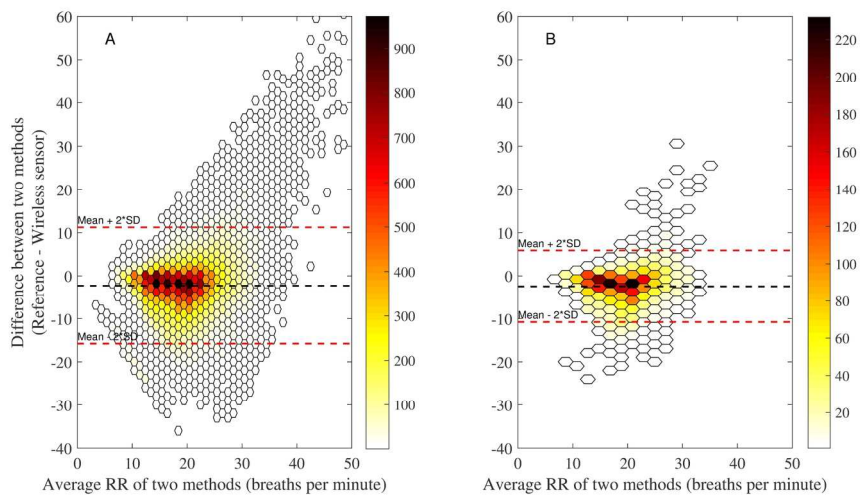

Bland and Altman plots for complete (a) and filtered (b) datasets for respiratory rate during admission at the surgical step-down unit with few (white) to many (dark red) measurement pairs

177x93mm (300 x 300 DPI)

review only

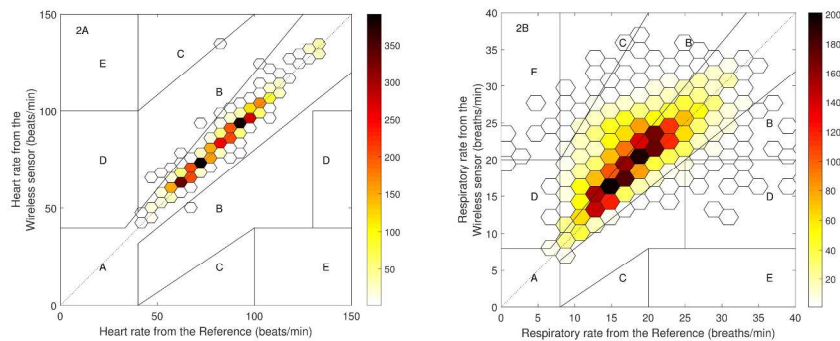

Clark error grid analysis to quantify clinical accuracy of the HR (a) and RR (b) measurements with the HealthPatch MD as compared to the reference monitor of the filtered dataset. Region (A) are points within 20% of the reference monitor, region (B) contains points outside 20% of the reference, but not leading to unnecessary treatment, region (C) are points leading to unnecessary treatment, region (D) indicates a potentially dangerous failure to detect bradycardia or tachycardia (a) or bradypnea or tachypnea (b), region (E) represents points where events are confused (e.g., bradycardia with bradypnea).

286x161mm (300 x 300 DPI)



Survival analysis of 36 wireless sensor measurements in 33 patients versus time with various threshold times (maximum duration of a gap in the data). Data loss longer than the threshold counts as failure. The vertical marks indicate the end of a measurement other than failure (i.e., when the patient is being discharged to the ward and data transmission stopped).

122x68mm (300 x 300 DPI)

view only

1  
2  
3  
4  
5  
6  
7  
8  
9  
10  
11  
12  
13  
14  
15  
16  
17  
18  
19  
20  
21  
22  
23  
24  
25  
26  
27  
28  
29  
30  
31  
32  
33  
34  
35  
36  
37  
38  
39  
40  
41  
42  
43  
44  
45  
46

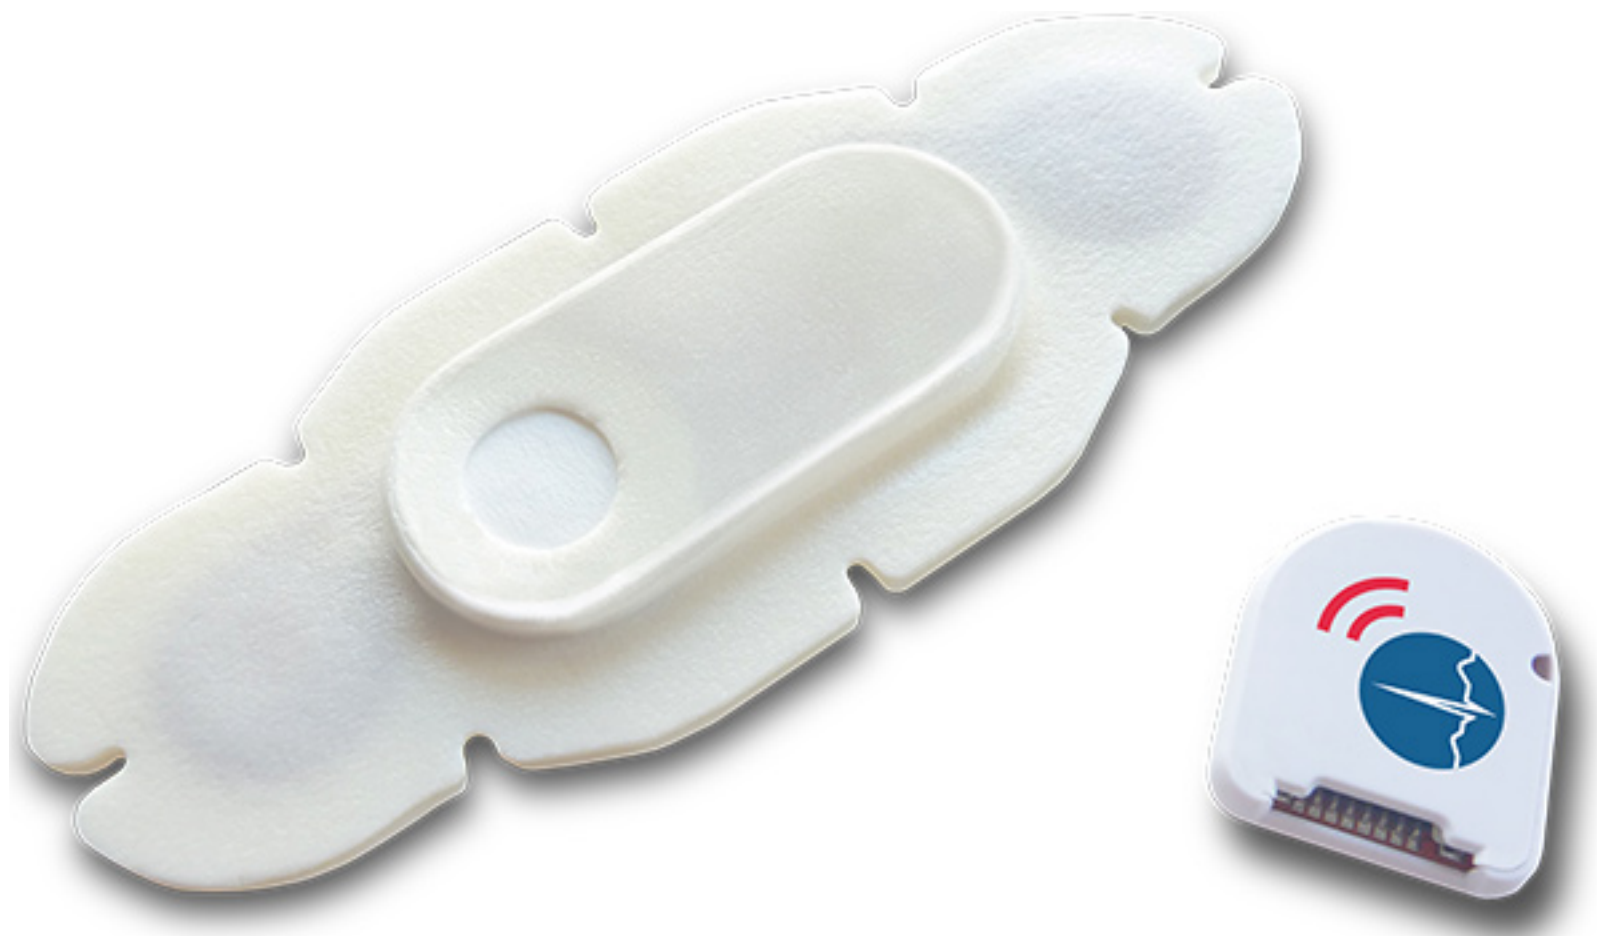

## STROBE Statement—checklist of items that should be included in reports of observational studies

|                              | Item No. | Recommendation                                                                                                                                                                                                                                                                                                                                                                                                                                                                                                                                                                                                                                                                                   | Page No.   | Relevant text from manuscript |
|------------------------------|----------|--------------------------------------------------------------------------------------------------------------------------------------------------------------------------------------------------------------------------------------------------------------------------------------------------------------------------------------------------------------------------------------------------------------------------------------------------------------------------------------------------------------------------------------------------------------------------------------------------------------------------------------------------------------------------------------------------|------------|-------------------------------|
| <b>Title and abstract</b>    | 1        | (a) Indicate the study's design with a commonly used term in the title or the abstract<br>(b) Provide in the abstract an informative and balanced summary of what was done and what was found                                                                                                                                                                                                                                                                                                                                                                                                                                                                                                    | 1 & 2<br>2 |                               |
| <b>Introduction</b>          |          |                                                                                                                                                                                                                                                                                                                                                                                                                                                                                                                                                                                                                                                                                                  |            |                               |
| Background/rationale         | 2        | Explain the scientific background and rationale for the investigation being reported                                                                                                                                                                                                                                                                                                                                                                                                                                                                                                                                                                                                             | 3          |                               |
| Objectives                   | 3        | State specific objectives, including any prespecified hypotheses                                                                                                                                                                                                                                                                                                                                                                                                                                                                                                                                                                                                                                 | 3          |                               |
| <b>Methods</b>               |          |                                                                                                                                                                                                                                                                                                                                                                                                                                                                                                                                                                                                                                                                                                  |            |                               |
| Study design                 | 4        | Present key elements of study design early in the paper                                                                                                                                                                                                                                                                                                                                                                                                                                                                                                                                                                                                                                          | 4          |                               |
| Setting                      | 5        | Describe the setting, locations, and relevant dates, including periods of recruitment, exposure, follow-up, and data collection                                                                                                                                                                                                                                                                                                                                                                                                                                                                                                                                                                  | 4          |                               |
| Participants                 | 6        | (a) <i>Cohort study</i> —Give the eligibility criteria, and the sources and methods of selection of participants. Describe methods of follow-up<br><i>Case-control study</i> —Give the eligibility criteria, and the sources and methods of case ascertainment and control selection. Give the rationale for the choice of cases and controls<br><i>Cross-sectional study</i> —Give the eligibility criteria, and the sources and methods of selection of participants<br>(b) <i>Cohort study</i> —For matched studies, give matching criteria and number of exposed and unexposed<br><i>Case-control study</i> —For matched studies, give matching criteria and the number of controls per case | 4          |                               |
| Variables                    | 7        | Clearly define all outcomes, exposures, predictors, potential confounders, and effect modifiers. Give diagnostic criteria, if applicable                                                                                                                                                                                                                                                                                                                                                                                                                                                                                                                                                         | 5          |                               |
| Data sources/<br>measurement | 8*       | For each variable of interest, give sources of data and details of methods of assessment (measurement). Describe comparability of assessment methods if there is more than one group                                                                                                                                                                                                                                                                                                                                                                                                                                                                                                             | 5          |                               |
| Bias                         | 9        | Describe any efforts to address potential sources of bias                                                                                                                                                                                                                                                                                                                                                                                                                                                                                                                                                                                                                                        | NA         |                               |
| Study size                   | 10       | Explain how the study size was arrived at                                                                                                                                                                                                                                                                                                                                                                                                                                                                                                                                                                                                                                                        | 6          |                               |

Continued on next page

|                        |     |                                                                                                                                                                                                                        |       |
|------------------------|-----|------------------------------------------------------------------------------------------------------------------------------------------------------------------------------------------------------------------------|-------|
| Quantitative variables | 11  | Explain how quantitative variables were handled in the analyses. If applicable, describe which groupings were chosen and why                                                                                           | 5     |
| Statistical methods    | 12  | (a) Describe all statistical methods, including those used to control for confounding                                                                                                                                  | 5 & 6 |
|                        |     | (b) Describe any methods used to examine subgroups and interactions                                                                                                                                                    | NA    |
|                        |     | (c) Explain how missing data were addressed                                                                                                                                                                            | 5     |
|                        |     | (d) <i>Cohort study</i> —If applicable, explain how loss to follow-up was addressed                                                                                                                                    | NA    |
|                        |     | (e) <i>Case-control study</i> —If applicable, explain how matching of cases and controls was addressed<br><i>Cross-sectional study</i> —If applicable, describe analytical methods taking account of sampling strategy |       |
|                        |     | (e) Describe any sensitivity analyses                                                                                                                                                                                  |       |
| <b>Results</b>         |     |                                                                                                                                                                                                                        |       |
| Participants           | 13* | (a) Report numbers of individuals at each stage of study—eg numbers potentially eligible, examined for eligibility, confirmed eligible, included in the study, completing follow-up, and analysed                      | 6     |
|                        |     | (b) Give reasons for non-participation at each stage                                                                                                                                                                   | 6     |
|                        |     | (c) Consider use of a flow diagram                                                                                                                                                                                     | NA    |
| Descriptive data       | 14* | (a) Give characteristics of study participants (eg demographic, clinical, social) and information on exposures and potential confounders                                                                               | 6     |
|                        |     | (b) Indicate number of participants with missing data for each variable of interest                                                                                                                                    | 6     |
|                        |     | (c) <i>Cohort study</i> —Summarise follow-up time (eg, average and total amount)                                                                                                                                       | 6     |
| Outcome data           | 15* | <i>Cohort study</i> —Report numbers of outcome events or summary measures over time                                                                                                                                    | 7 & 8 |
|                        |     | <i>Case-control study</i> —Report numbers in each exposure category, or summary measures of exposure                                                                                                                   |       |
|                        |     | <i>Cross-sectional study</i> —Report numbers of outcome events or summary measures                                                                                                                                     |       |
| Main results           | 16  | (a) Give unadjusted estimates and, if applicable, confounder-adjusted estimates and their precision (eg, 95% confidence interval). Make clear which confounders were adjusted for and why they were included           | 7     |
|                        |     | (b) Report category boundaries when continuous variables were categorized                                                                                                                                              | 7     |
|                        |     | (c) If relevant, consider translating estimates of relative risk into absolute risk for a meaningful time period                                                                                                       | NA    |

Continued on next page

|                          |    |                                                                                                                                                                            |        |
|--------------------------|----|----------------------------------------------------------------------------------------------------------------------------------------------------------------------------|--------|
| Other analyses           | 17 | Report other analyses done—eg analyses of subgroups and interactions, and sensitivity analyses                                                                             | 8 & 9  |
| <b>Discussion</b>        |    |                                                                                                                                                                            |        |
| Key results              | 18 | Summarise key results with reference to study objectives                                                                                                                   | 9      |
| Limitations              | 19 | Discuss limitations of the study, taking into account sources of potential bias or imprecision. Discuss both direction and magnitude of any potential bias                 | 9 & 10 |
| Interpretation           | 20 | Give a cautious overall interpretation of results considering objectives, limitations, multiplicity of analyses, results from similar studies, and other relevant evidence | 9 & 10 |
| Generalisability         | 21 | Discuss the generalisability (external validity) of the study results                                                                                                      | 11     |
| <b>Other information</b> |    |                                                                                                                                                                            |        |
| Funding                  | 22 | Give the source of funding and the role of the funders for the present study and, if applicable, for the original study on which the present article is based              | 11     |

\*Give information separately for cases and controls in case-control studies and, if applicable, for exposed and unexposed groups in cohort and cross-sectional studies.

**Note:** An Explanation and Elaboration article discusses each checklist item and gives methodological background and published examples of transparent reporting. The STROBE checklist is best used in conjunction with this article (freely available on the Web sites of PLoS Medicine at <http://www.plosmedicine.org/>, Annals of Internal Medicine at <http://www.annals.org/>, and Epidemiology at <http://www.epidem.com/>). Information on the STROBE Initiative is available at [www.strobe-statement.org](http://www.strobe-statement.org).
