# Supplementary figures and images for: Reliability of wireless monitoring using a wearable patch sensor in high-risk surgical patients at a step-down unit in the Netherlands: a clinical validation study
Source: PubMed Central journal article supplement — BMJ Open. 2018 Feb 27;8(2):e020162. doi: 10.1136/bmjopen-2017-020162 (PMC5855309; doi:10.1136/bmjopen-2017-020162), 2018-02-27

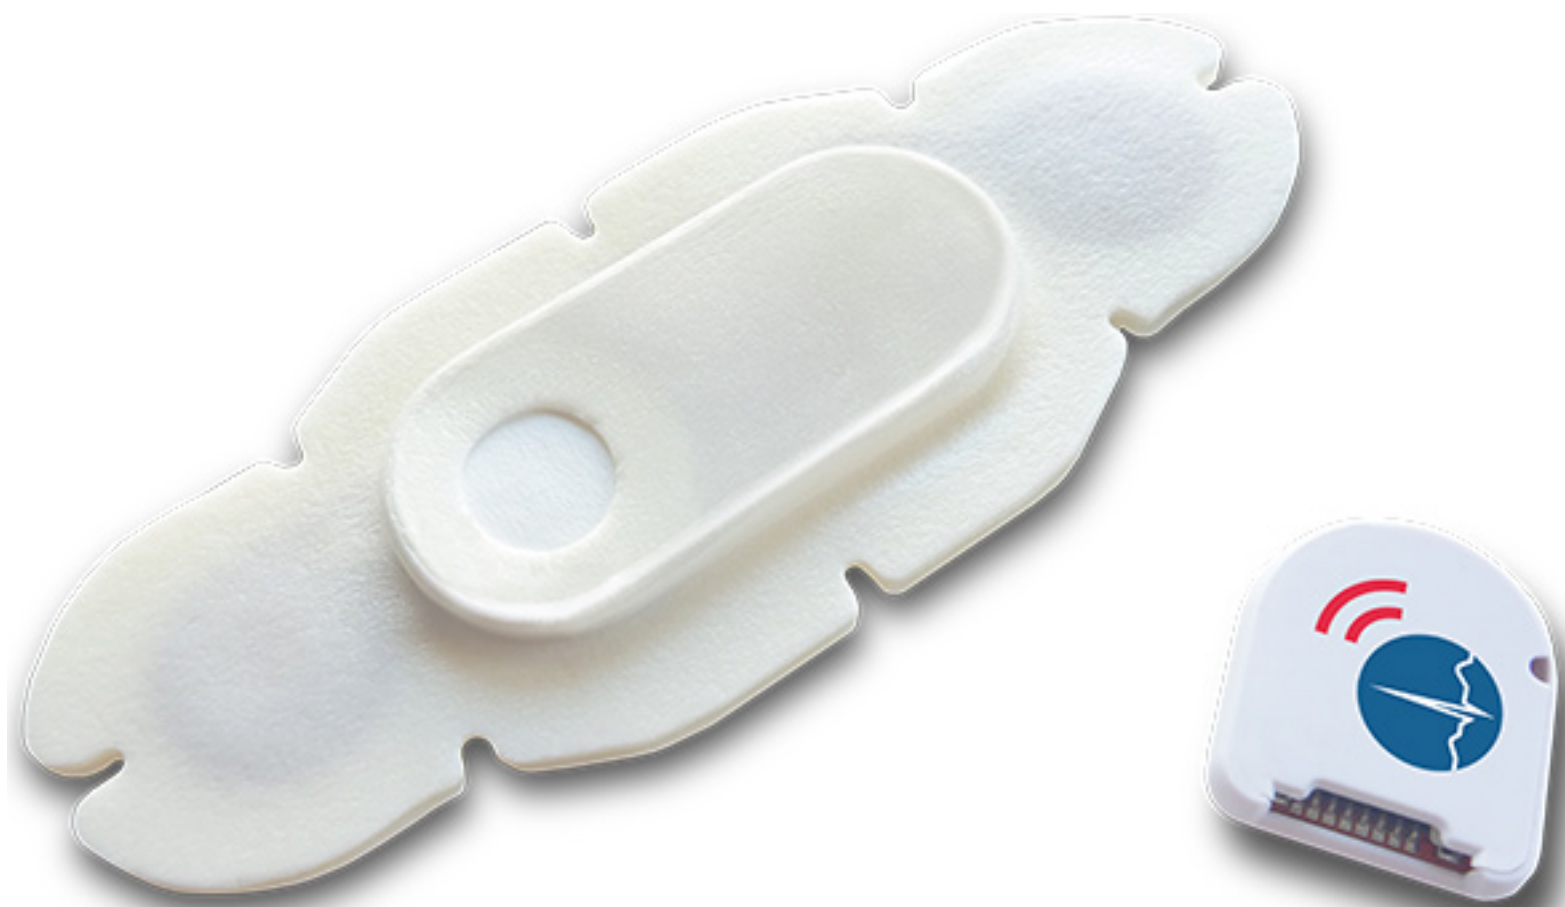

Supplement: bmjopen-2017-020162supp001.pdf [file bmjopen-2017-020162supp001.pdf]
